# Supplementary material for: Surface modification using crosslinking of diamine and a bis(diarylcarbene): synthesis, characterization, and antibacterial activity via binding hydrogen peroxide
Source: Royal Society of Chemistry journal article supplement (doi:10.1039/c7ra05258h), 2017-01-01

## Supporting Information

### Surface Modification Using Crosslinking of Diamine and Bis(diarylcarbene): Synthesis, Characterization, and its Antibacterial Activity via Binding Hydrogen Peroxide

Pengfei Yang<sup>†‡</sup>, Mark G. Moloney<sup>†,\*</sup>

<sup>†</sup>Chemistry Research Laboratory, Department of Chemistry, University of Oxford, OX1 3TA, UK

<sup>‡</sup>School of Chemistry and Pharmaceutical Engineering, Qilu University of Technology, Jinan 250353, P. R. China

\*Corresponding author. [mark.moloney@chem.ox.ac.uk](mailto:mark.moloney@chem.ox.ac.uk).

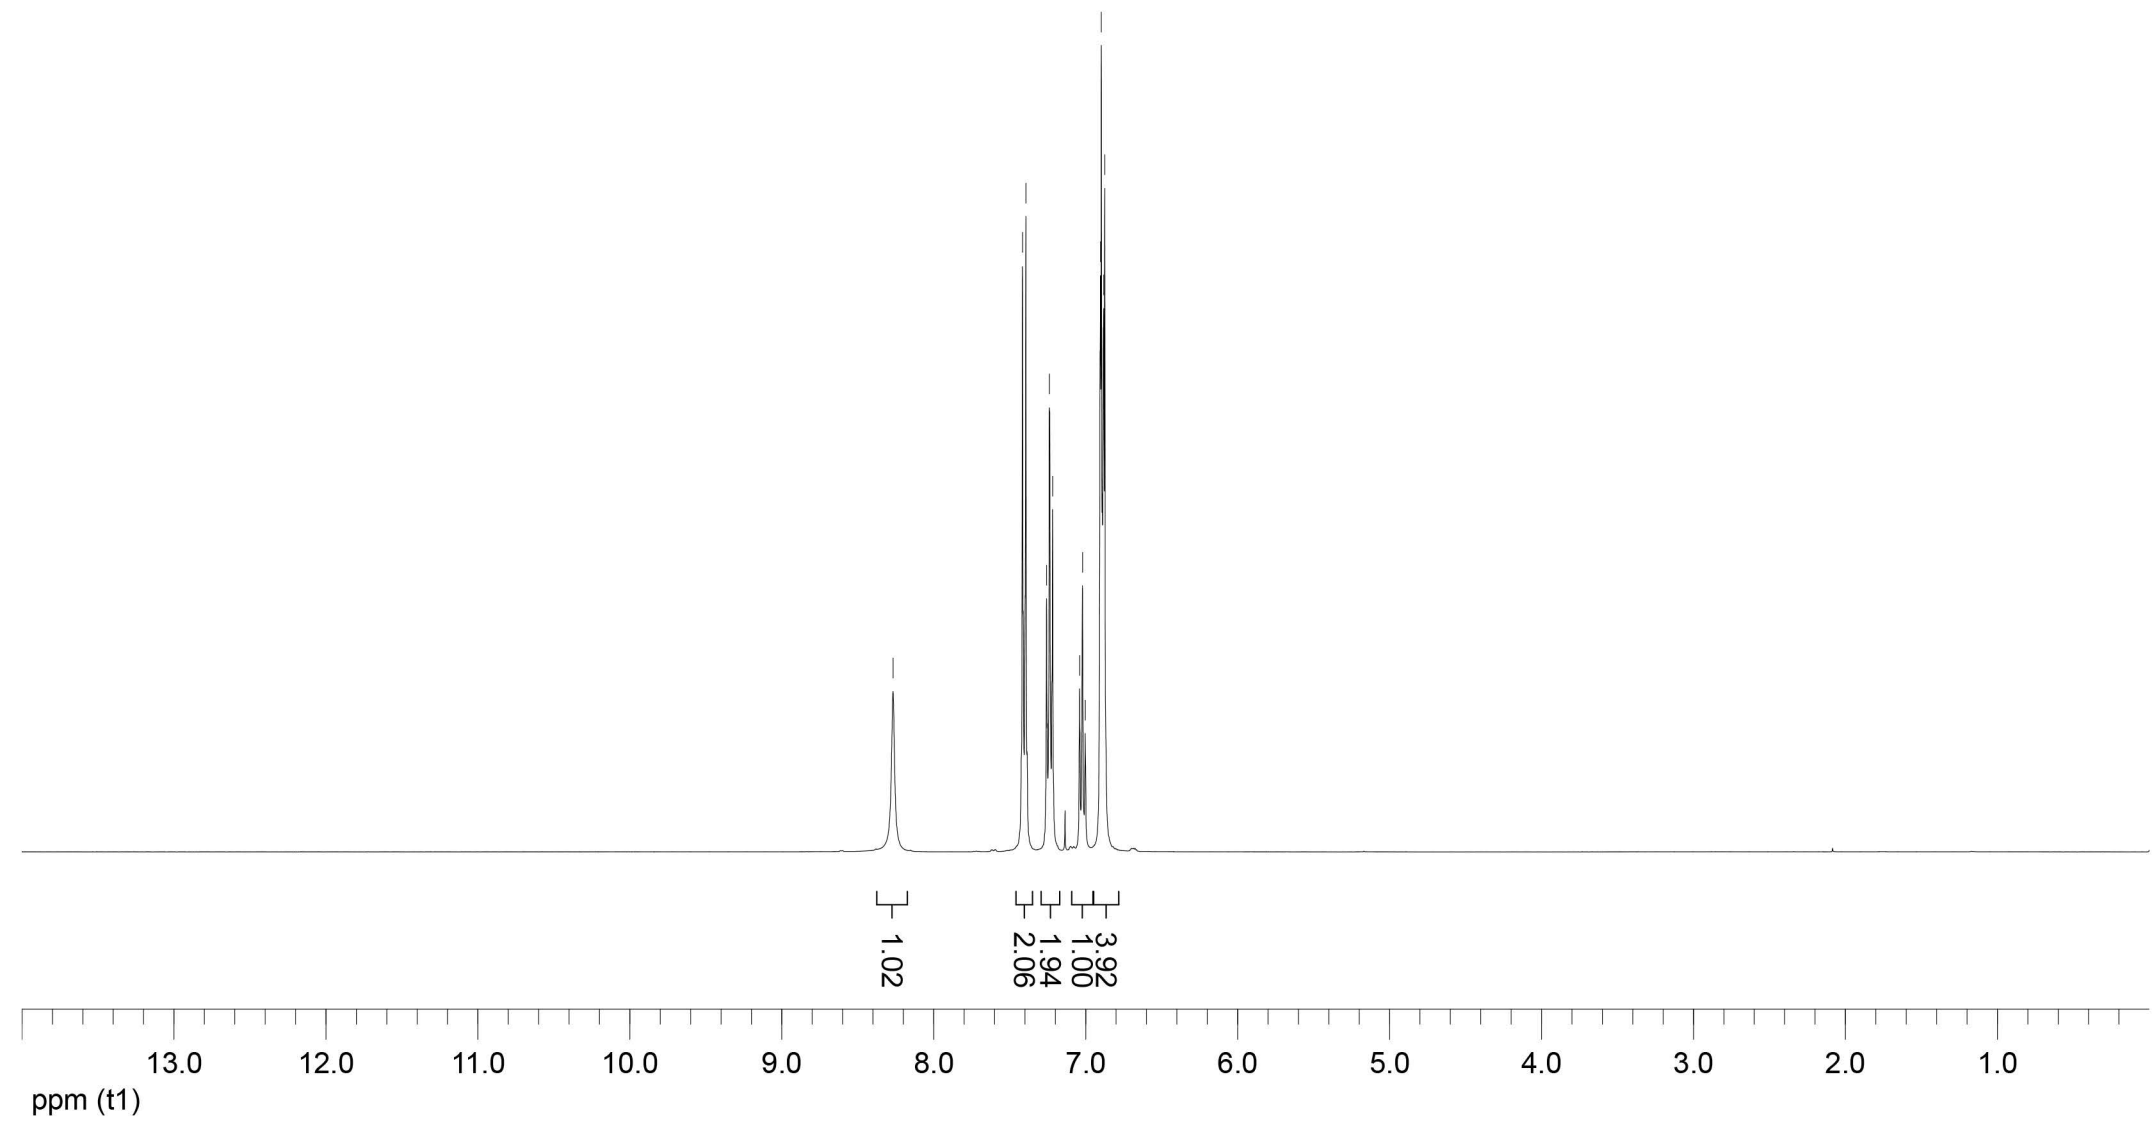

156.8  
155.8  
155.6  
155.4  
155.0  
154.6  
130.1  
129.9  
123.8  
122.6  
120.1  
119.3  
119.1  
117.3  
114.4  
111.6

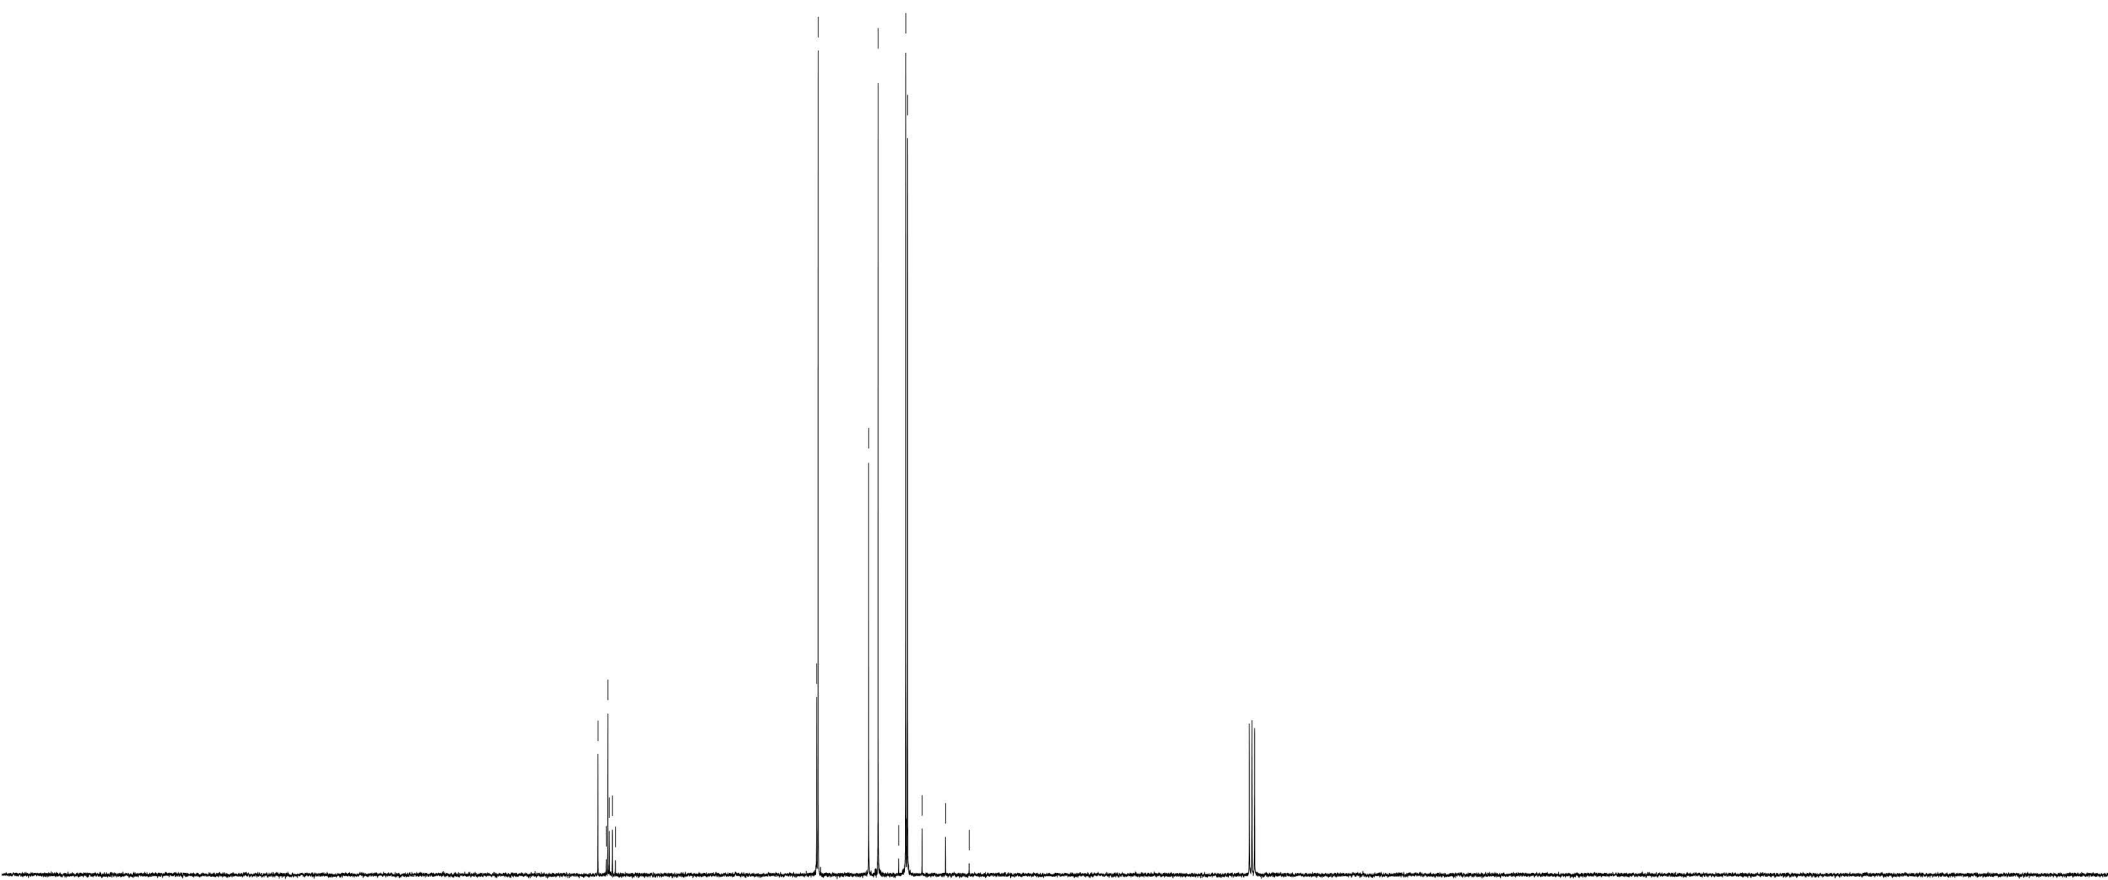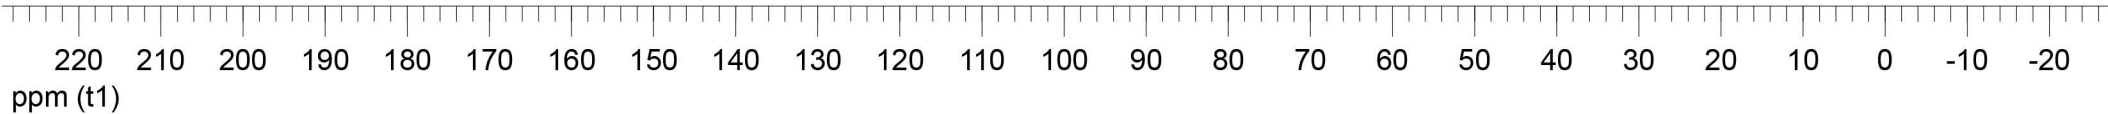

3

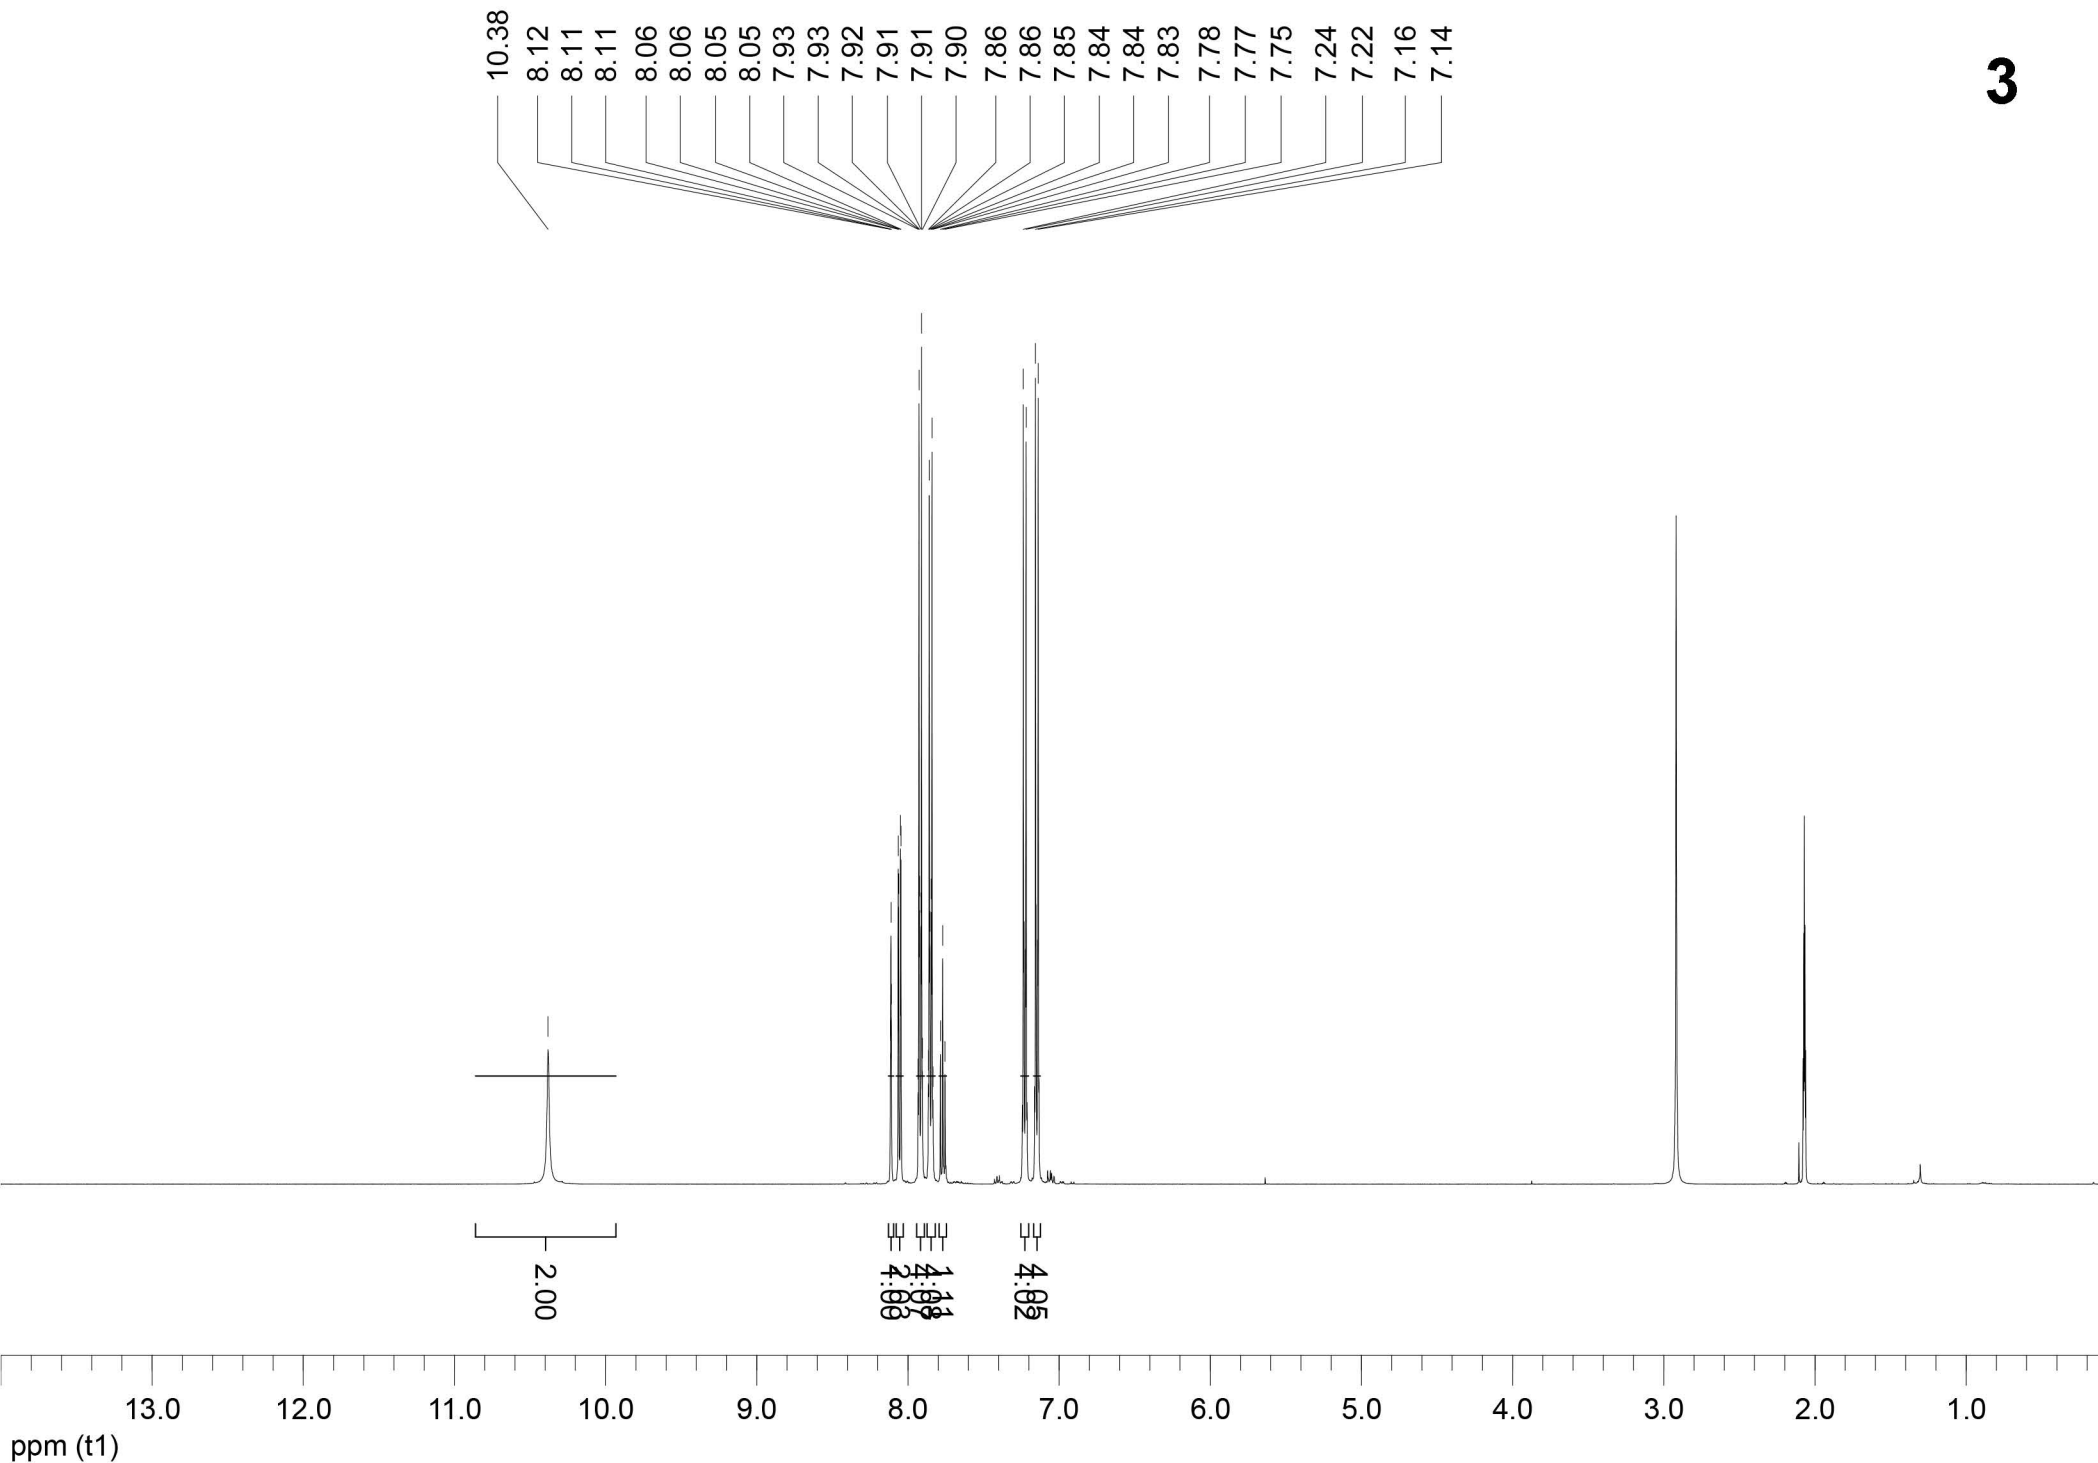

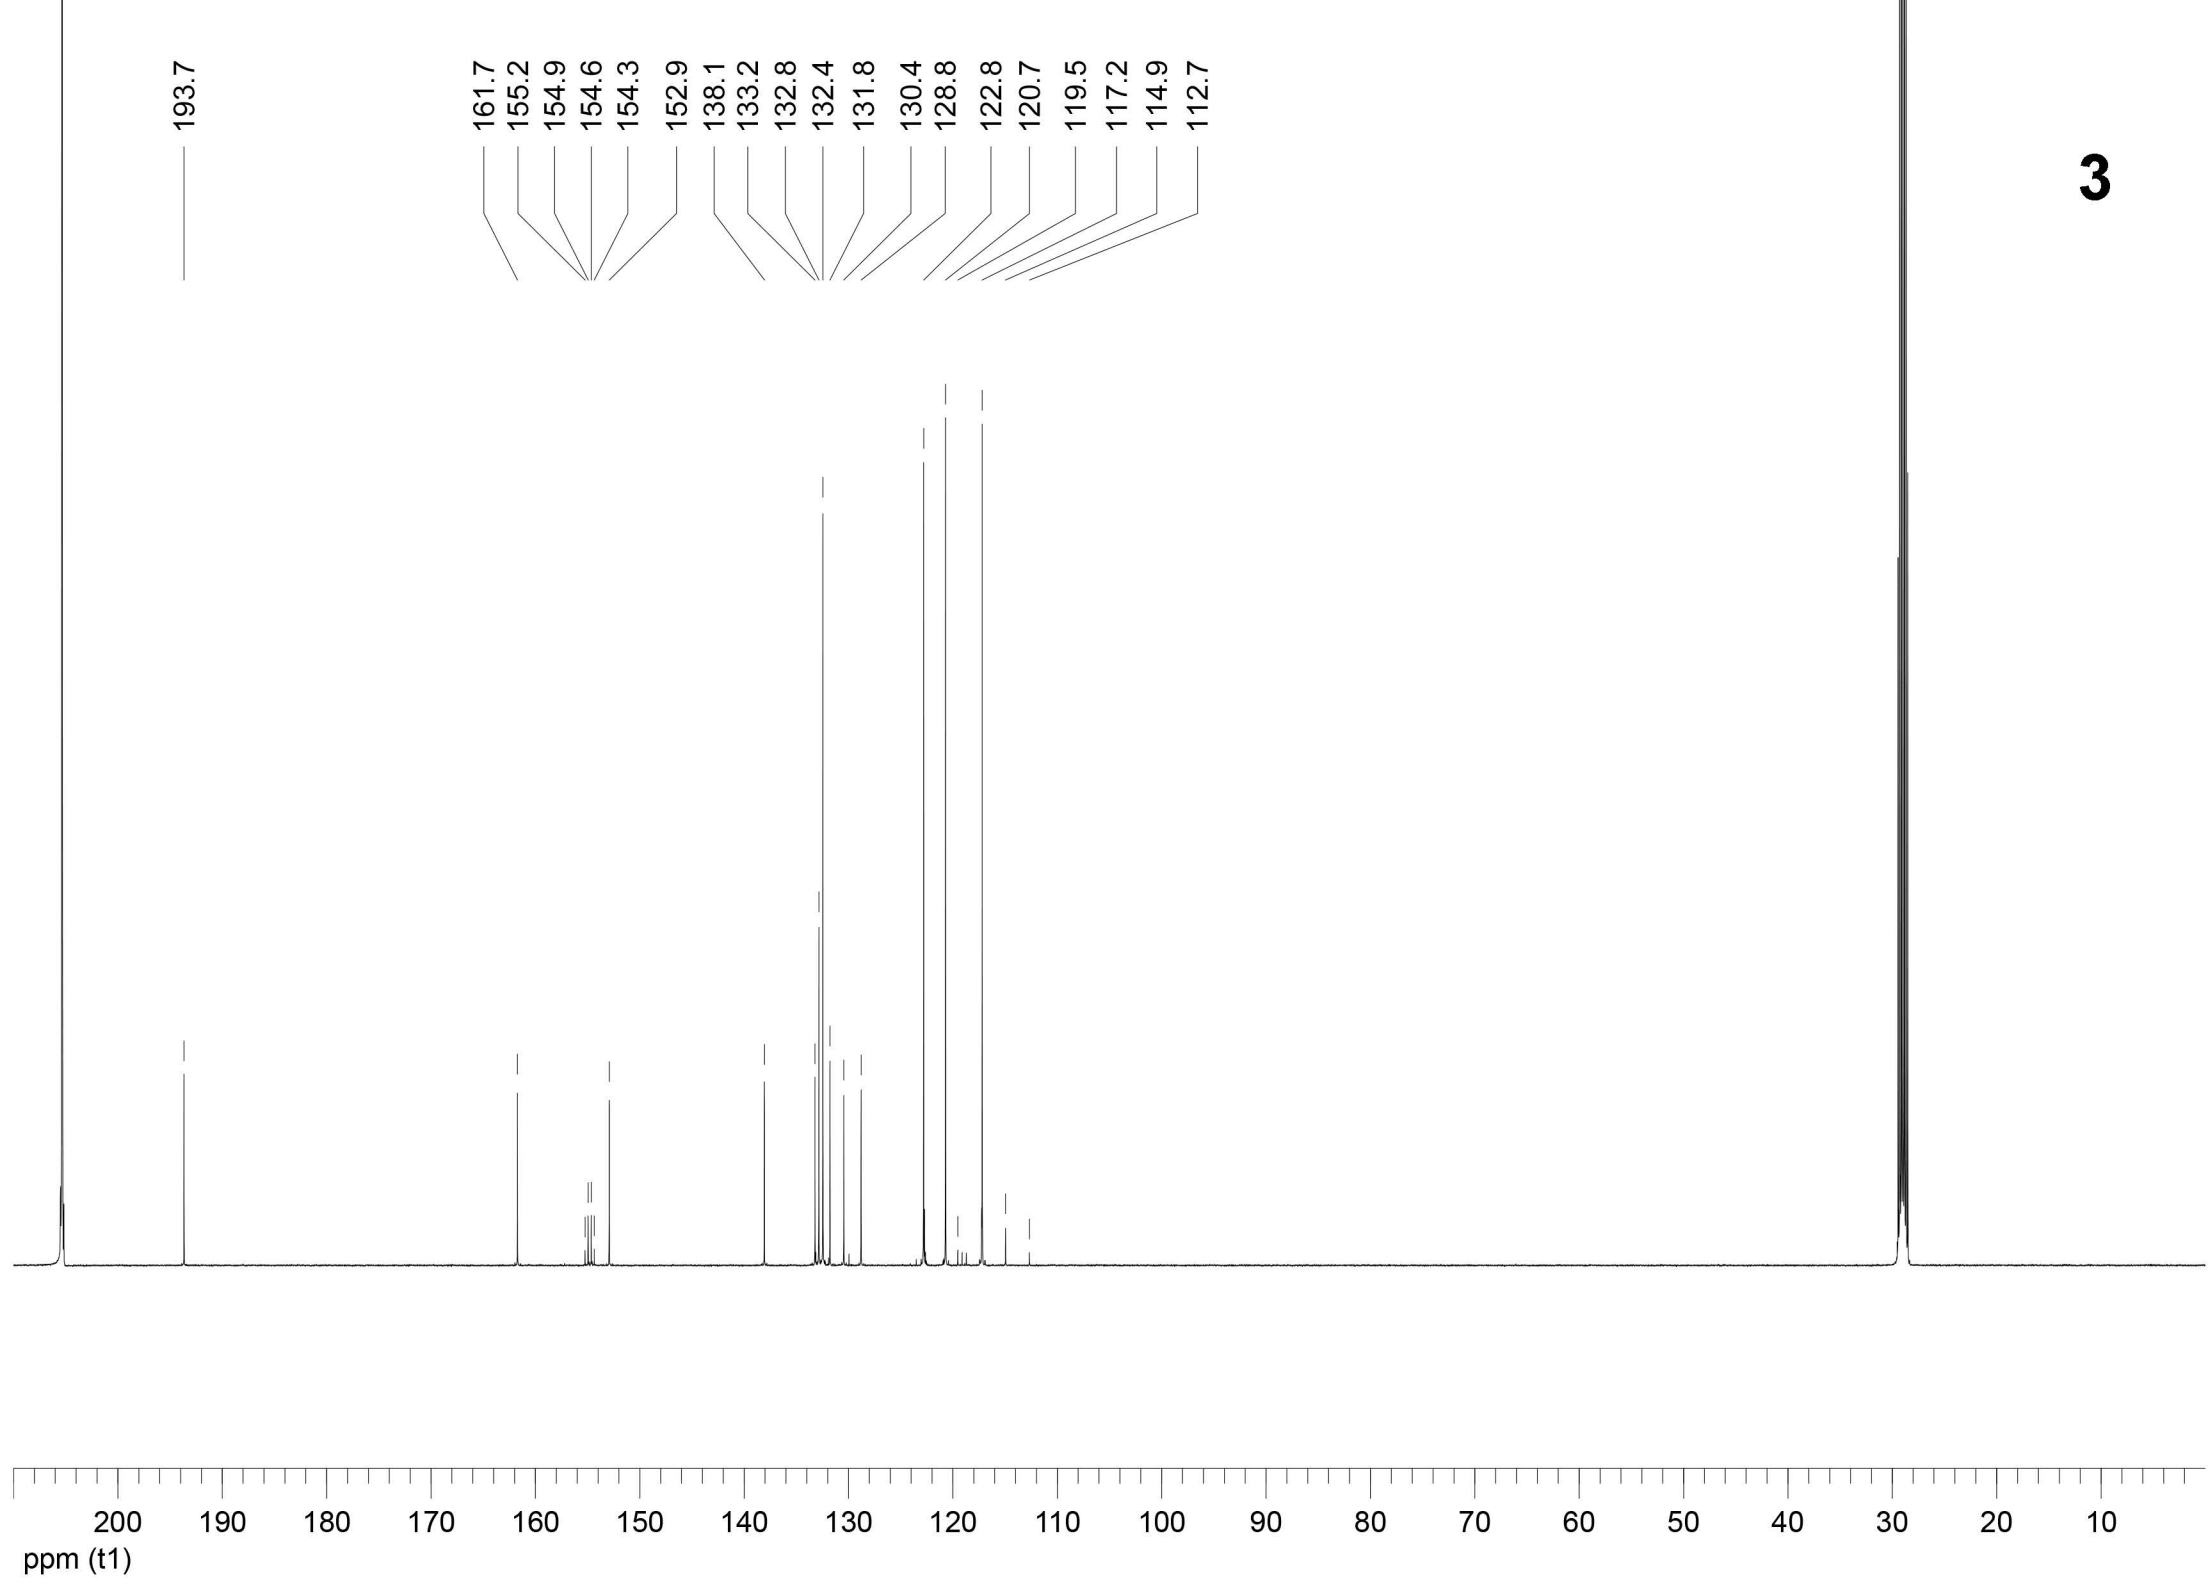

4

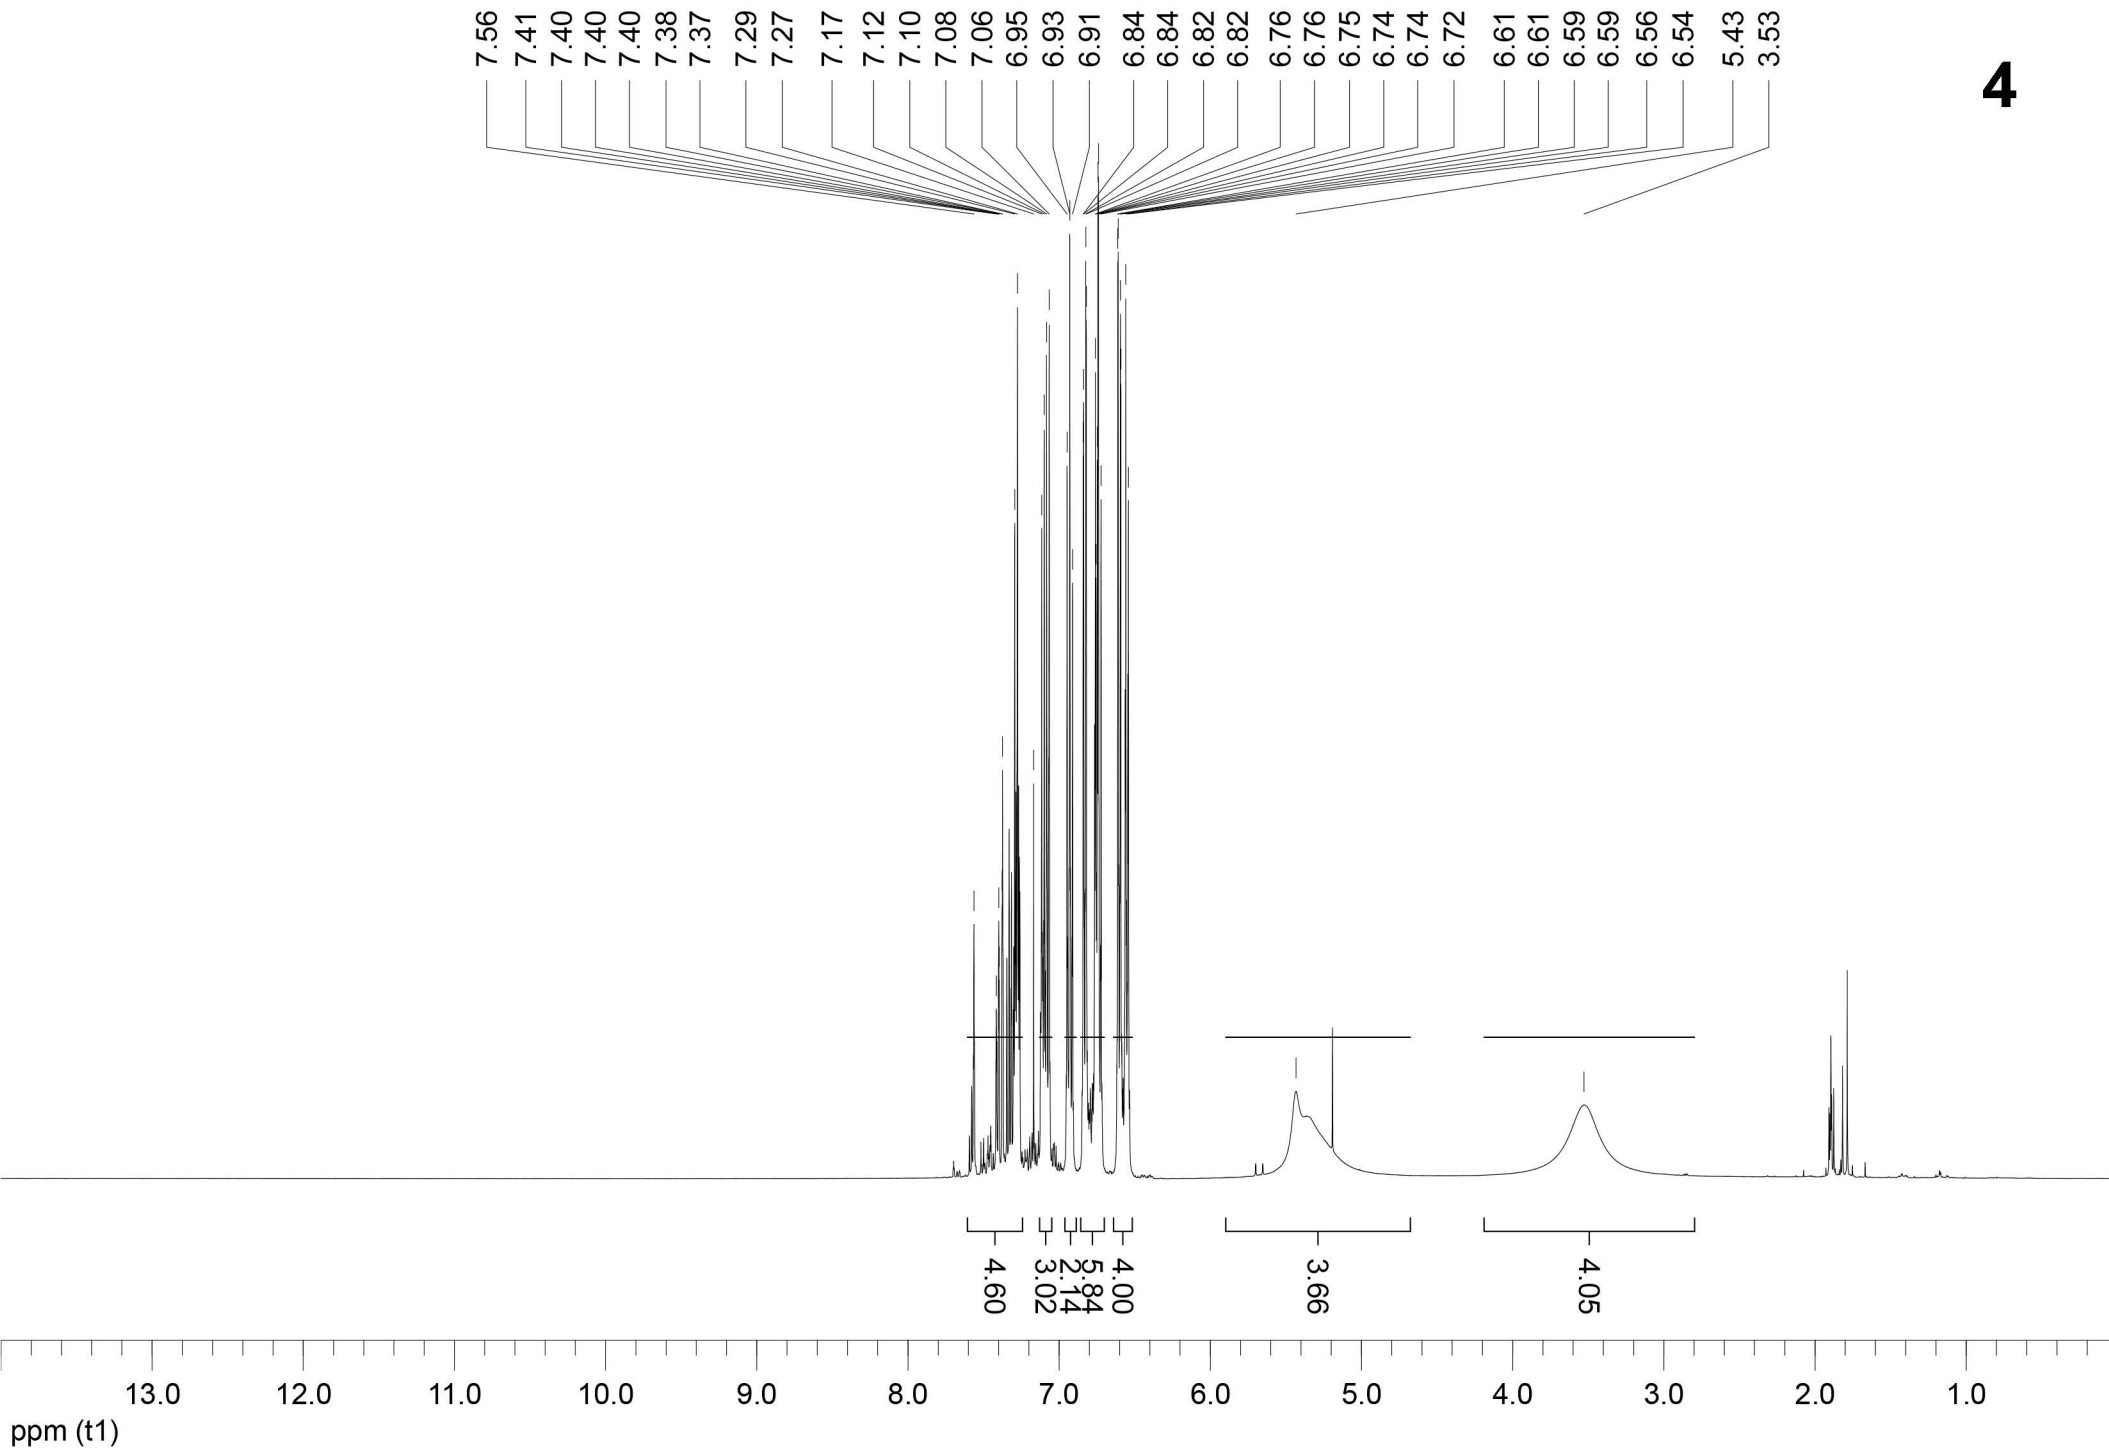

159.7  
159.5  
159.3  
159.1  
149.1  
148.8  
148.3  
148.1  
147.8  
147.6  
147.4  
143.4  
143.3  
143.0  
142.9  
140.0  
138.7  
134.4  
133.0  
132.5  
132.3  
130.3  
129.4  
129.3  
128.3  
127.9  
127.8  
127.1  
126.5  
126.4  
126.0  
125.5  
124.7  
121.7  
121.6  
121.3  
121.2  
117.6  
117.5  
116.8  
116.3  
116.2

4

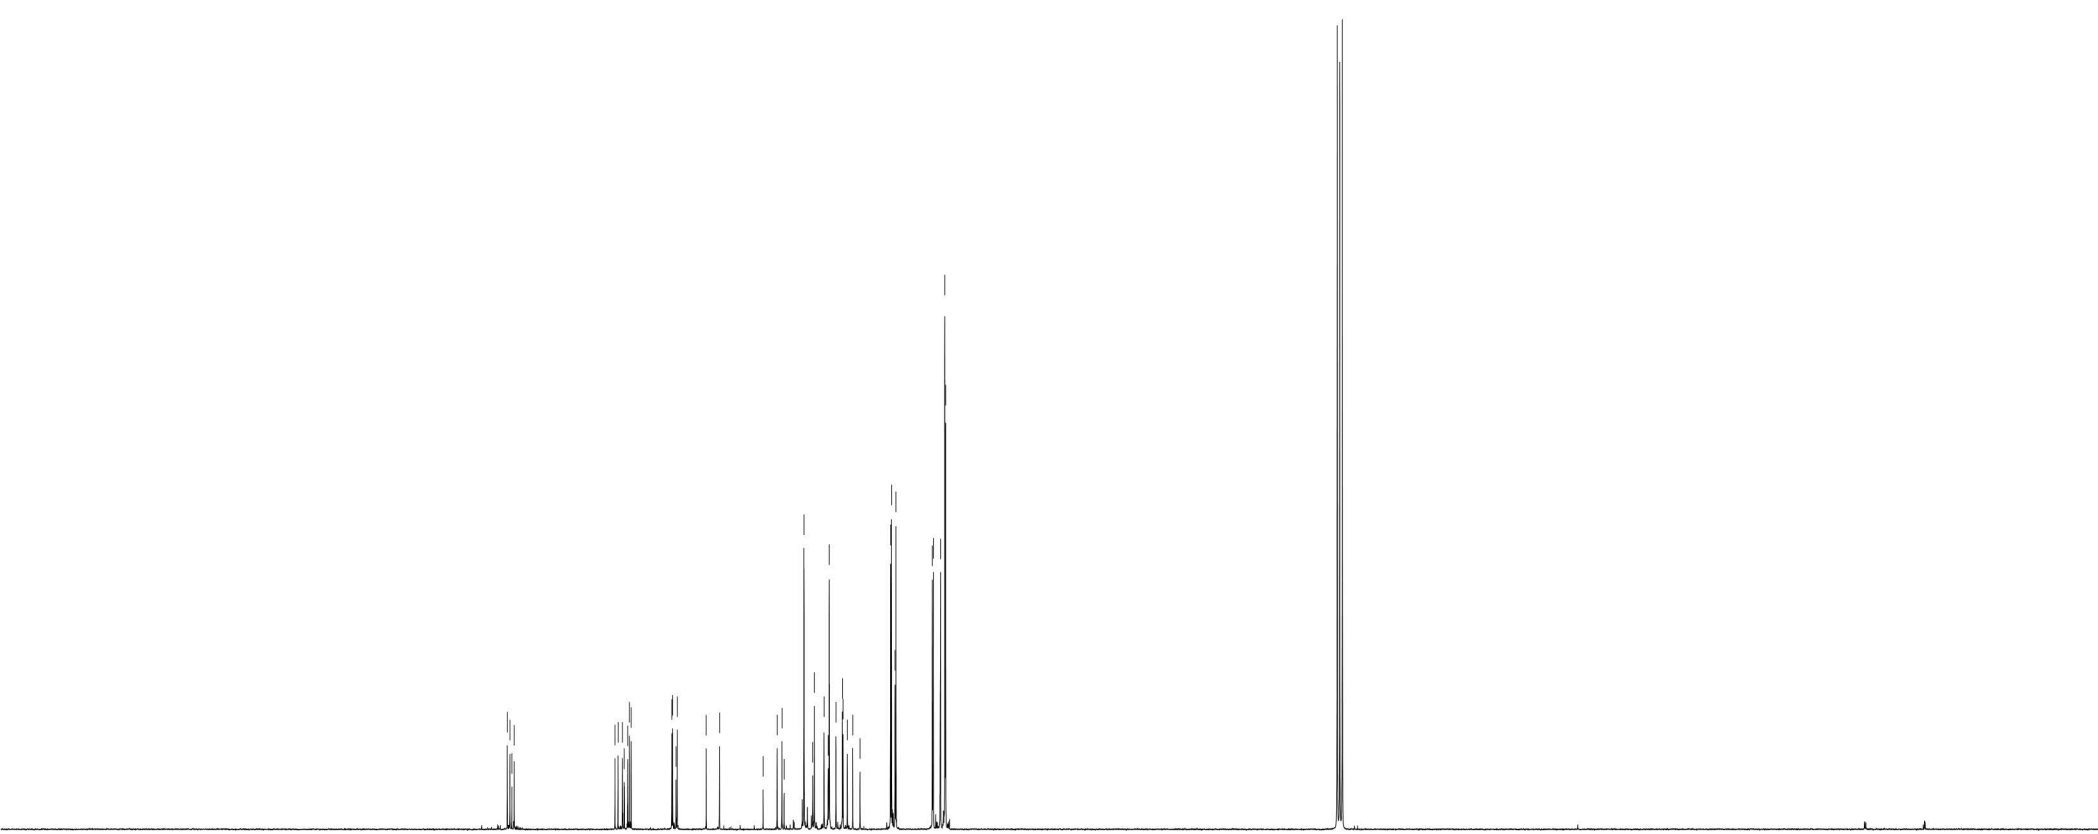

200  
190  
180  
170  
160  
150  
140  
130  
120  
110  
100  
90  
80  
70  
60  
50  
40  
30  
20  
10  
ppm (t1)

5

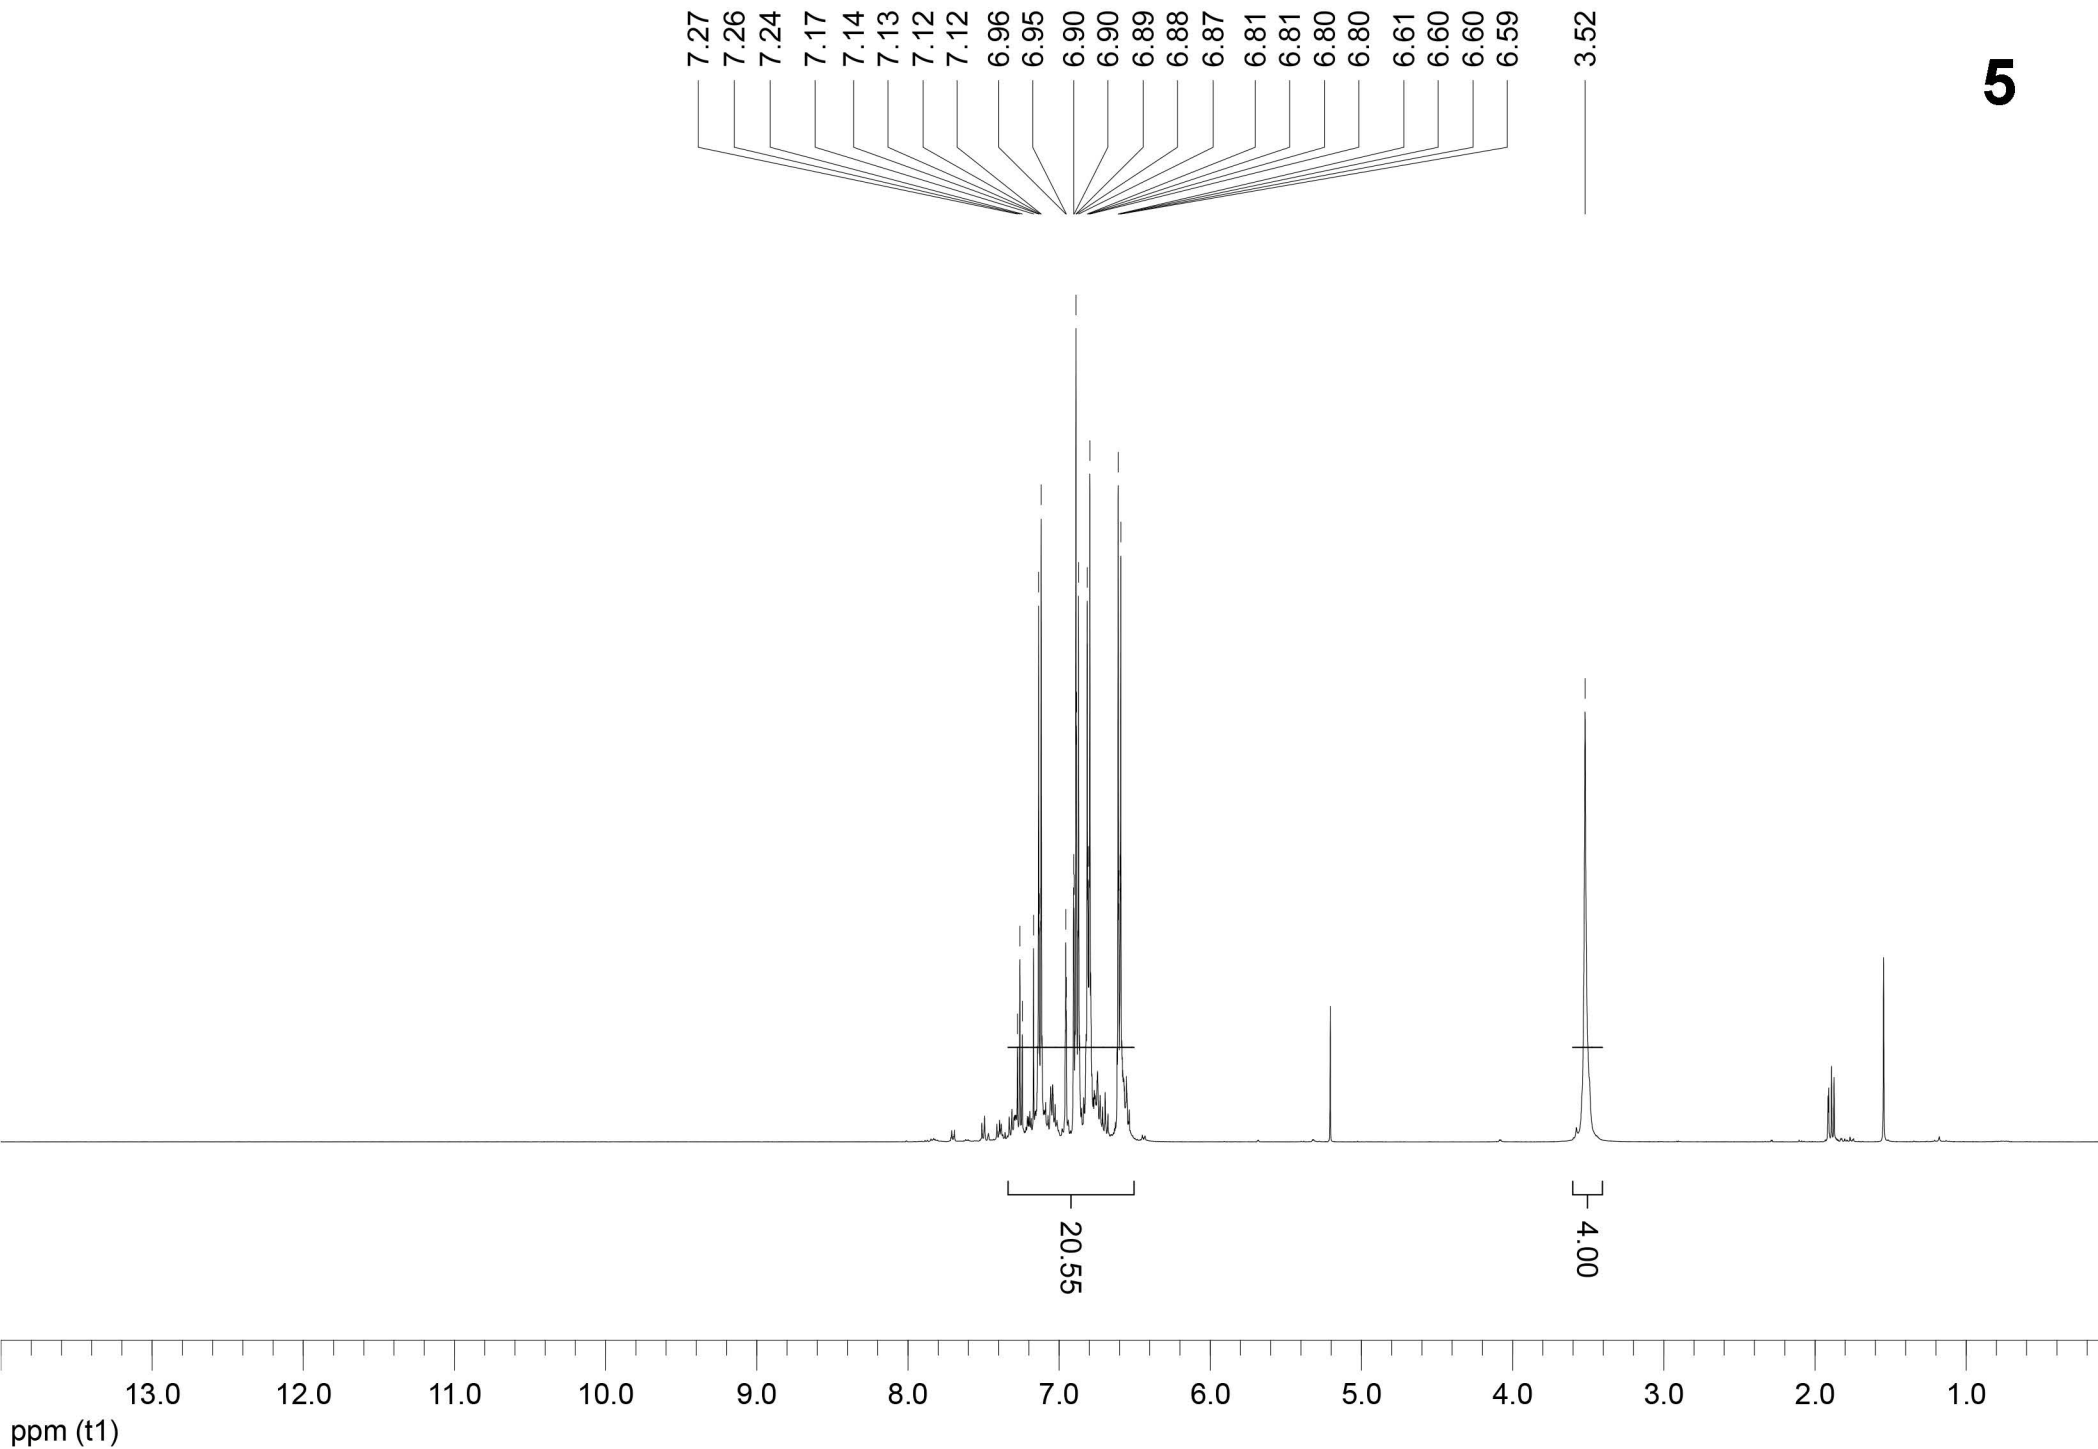



**5**

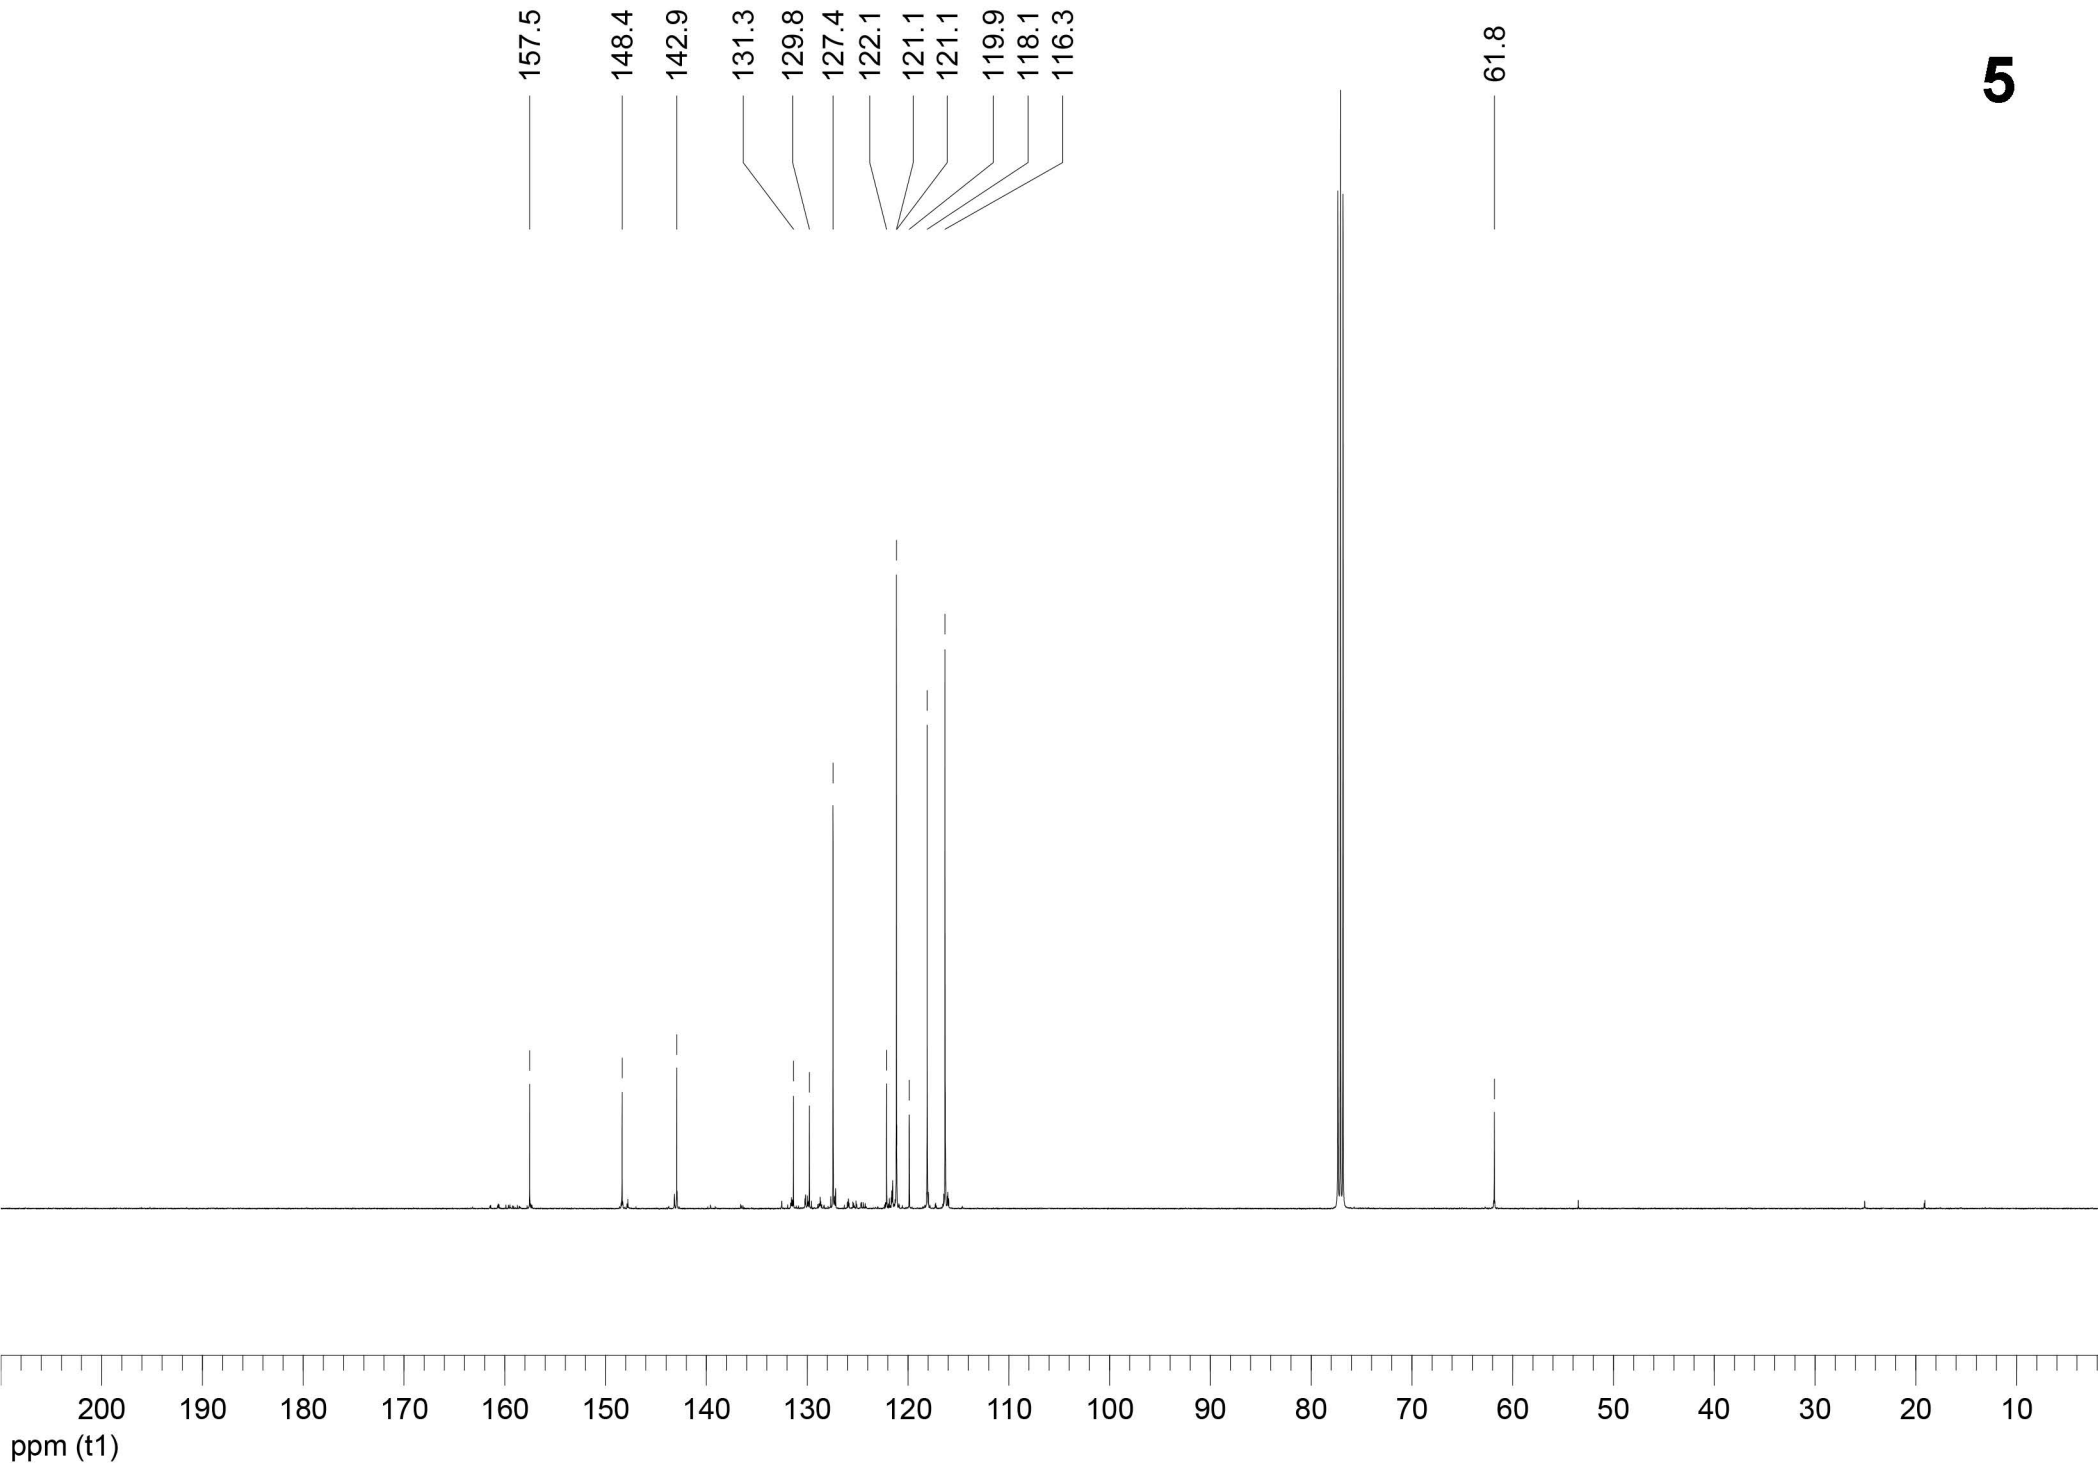

**6**

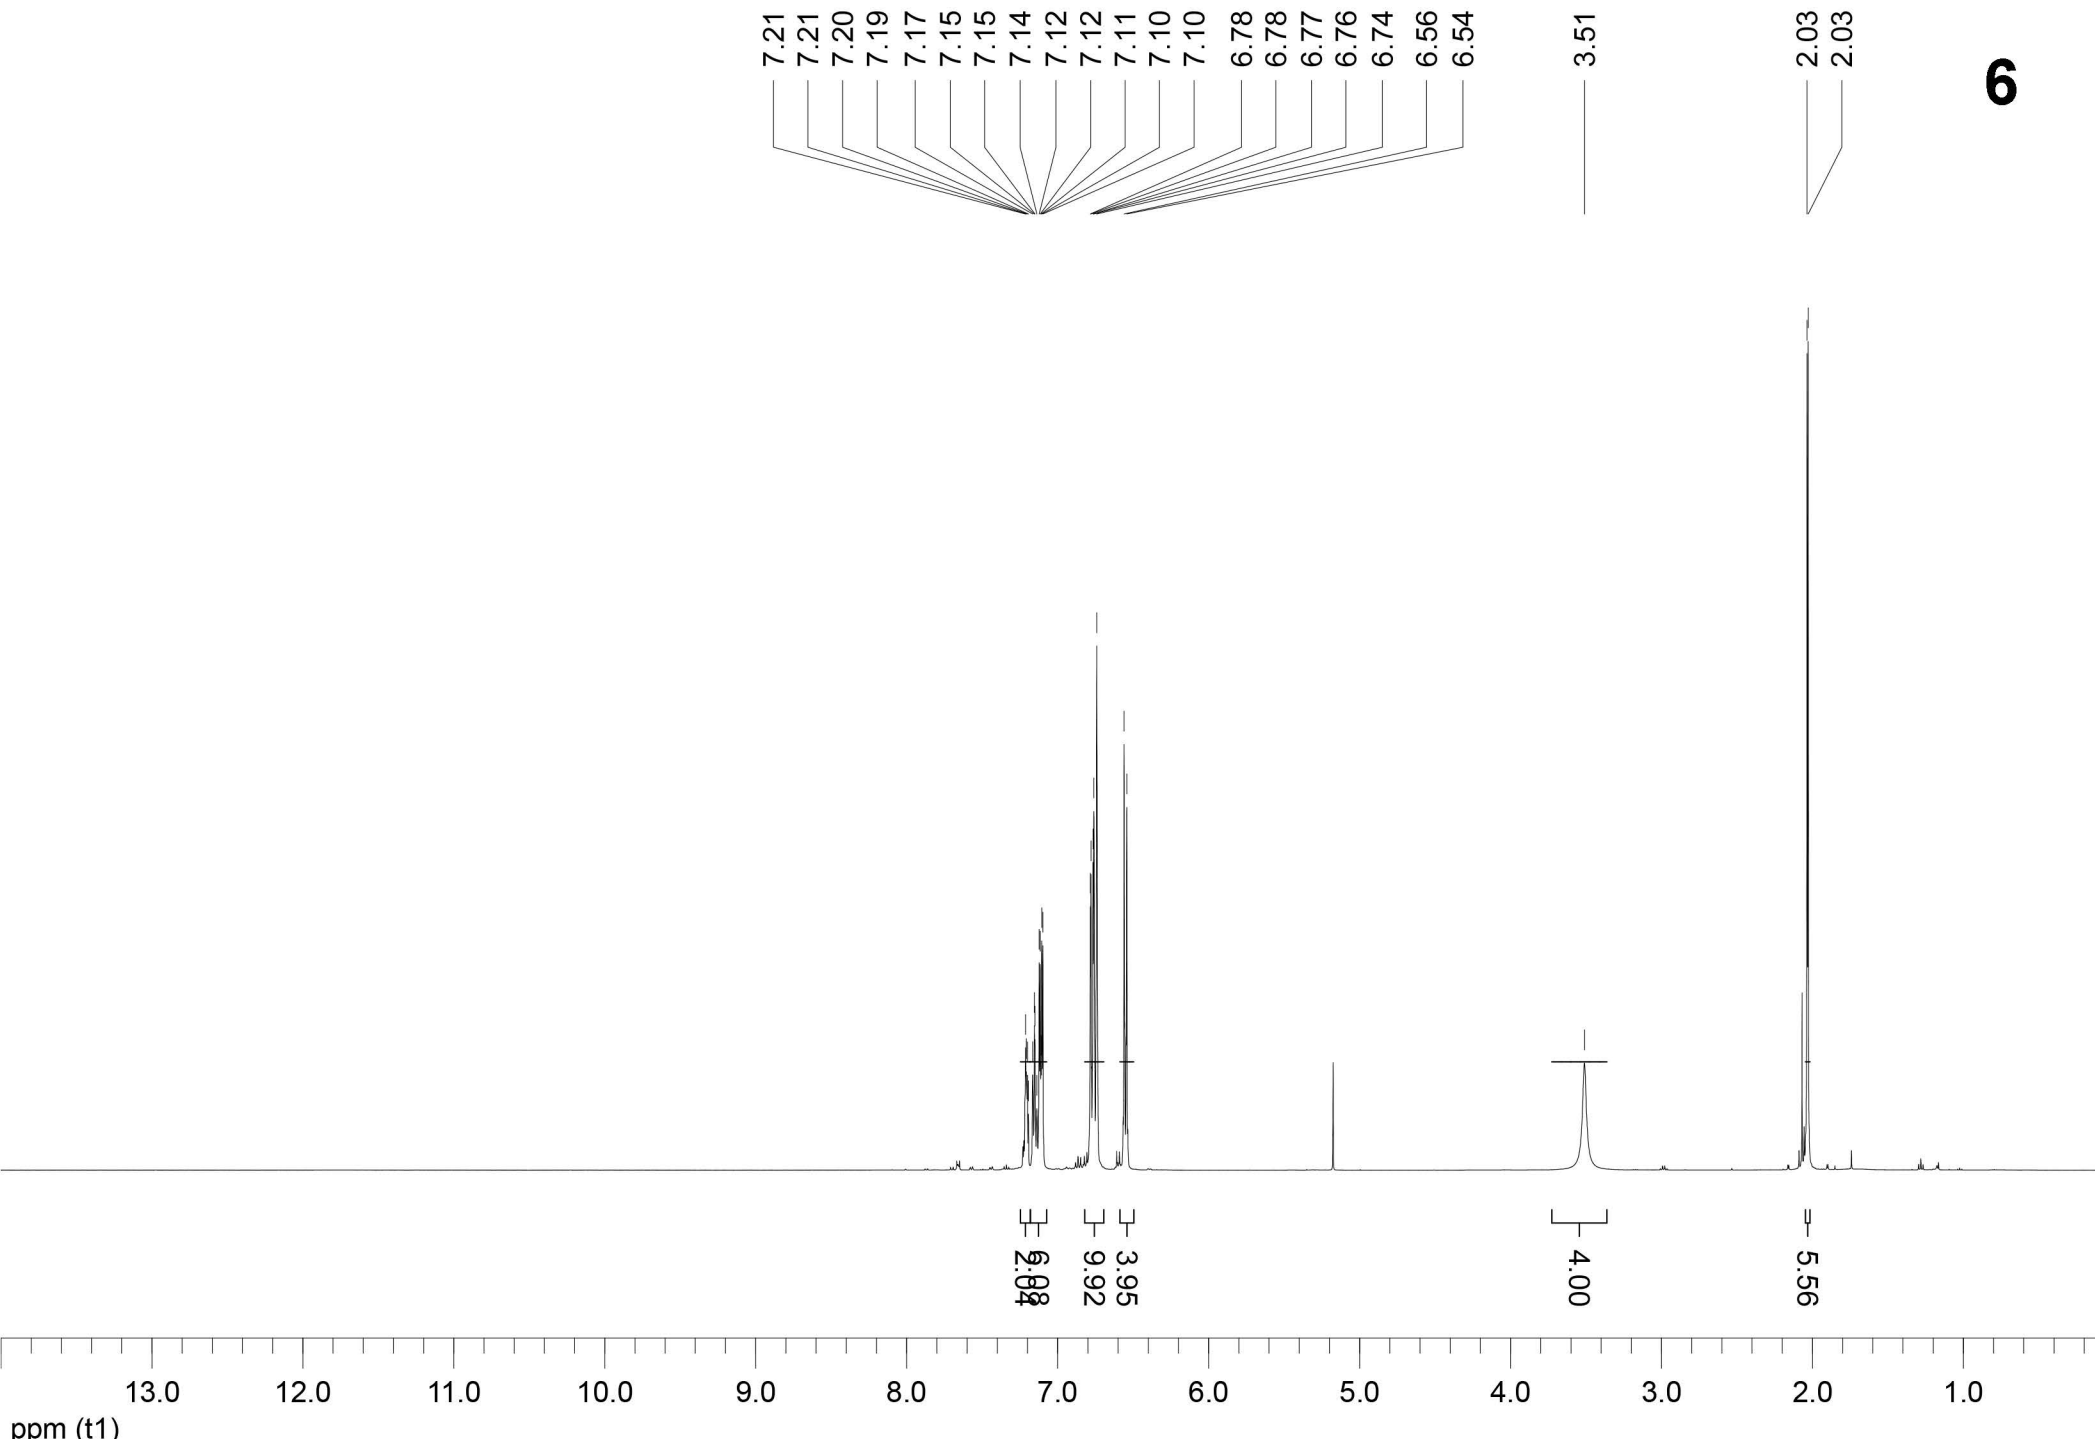

170.1  
158.9  
148.1  
143.1  
140.6  
133.5  
128.8  
126.4  
126.4  
125.4  
125.4  
121.3  
117.0  
116.3

76.3

21.3

**6**

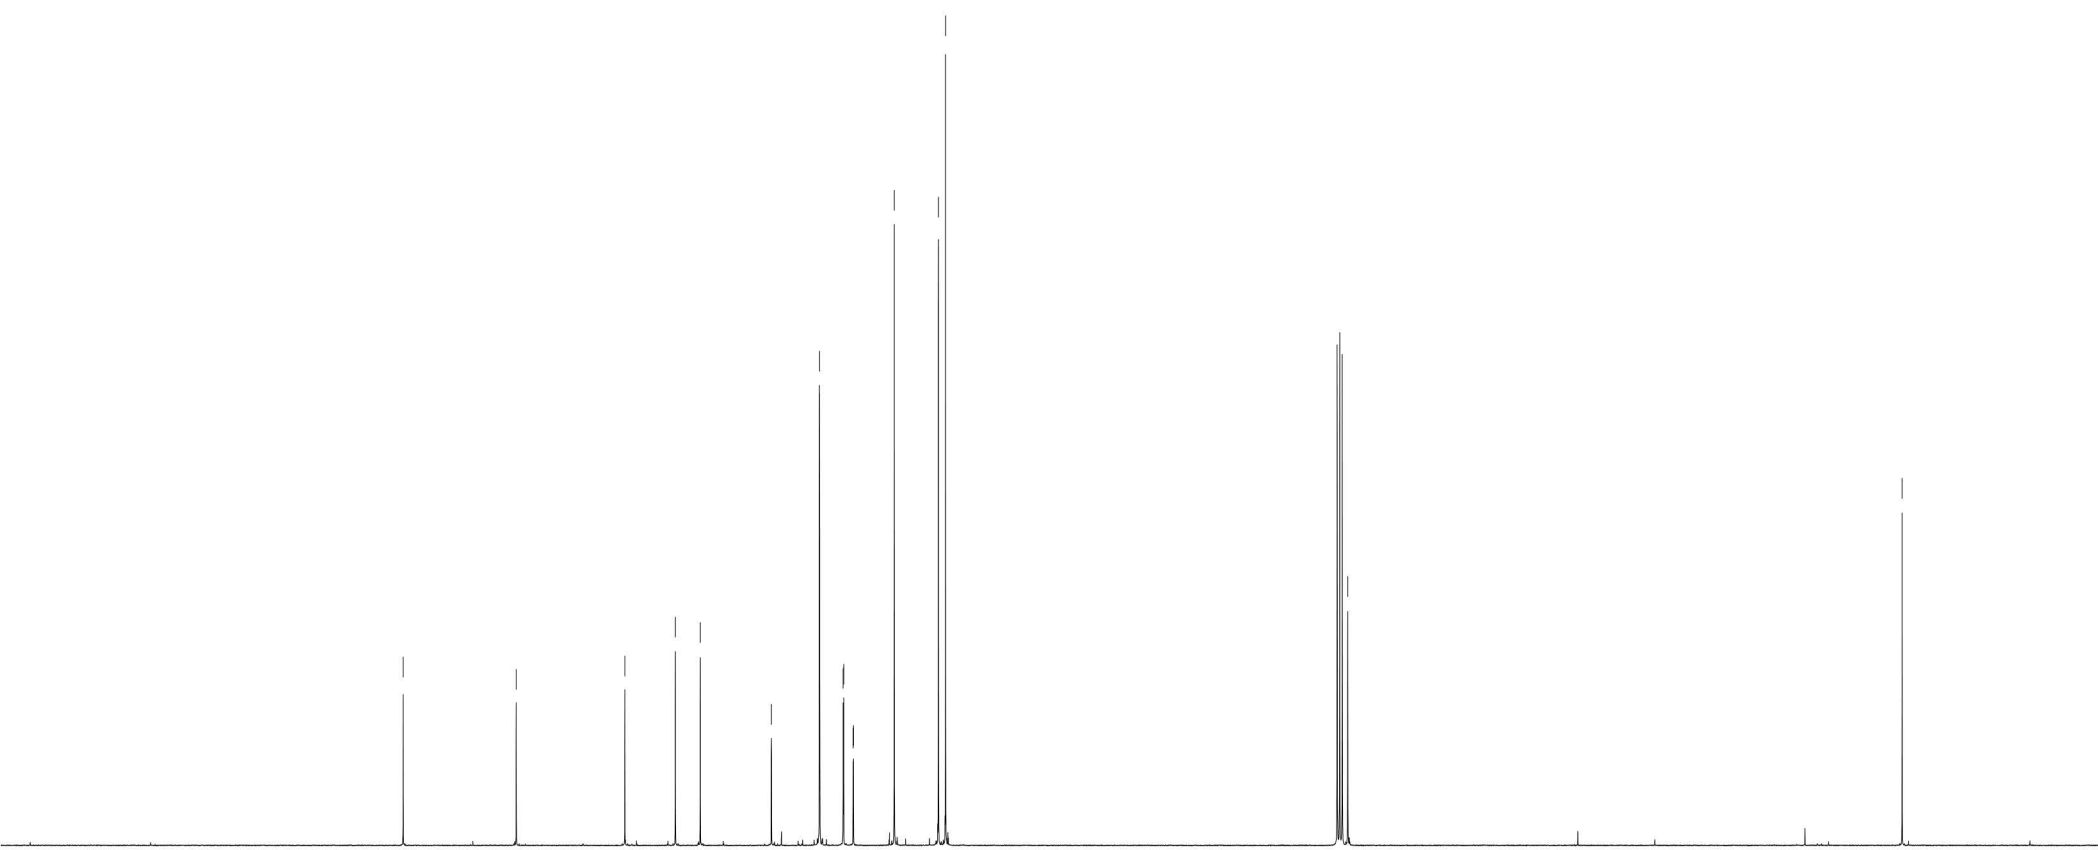

200 190 180 170 160 150 140 130 120 110 100 90 80 70 60 50 40 30 20 10  
ppm (t1)

**7a**

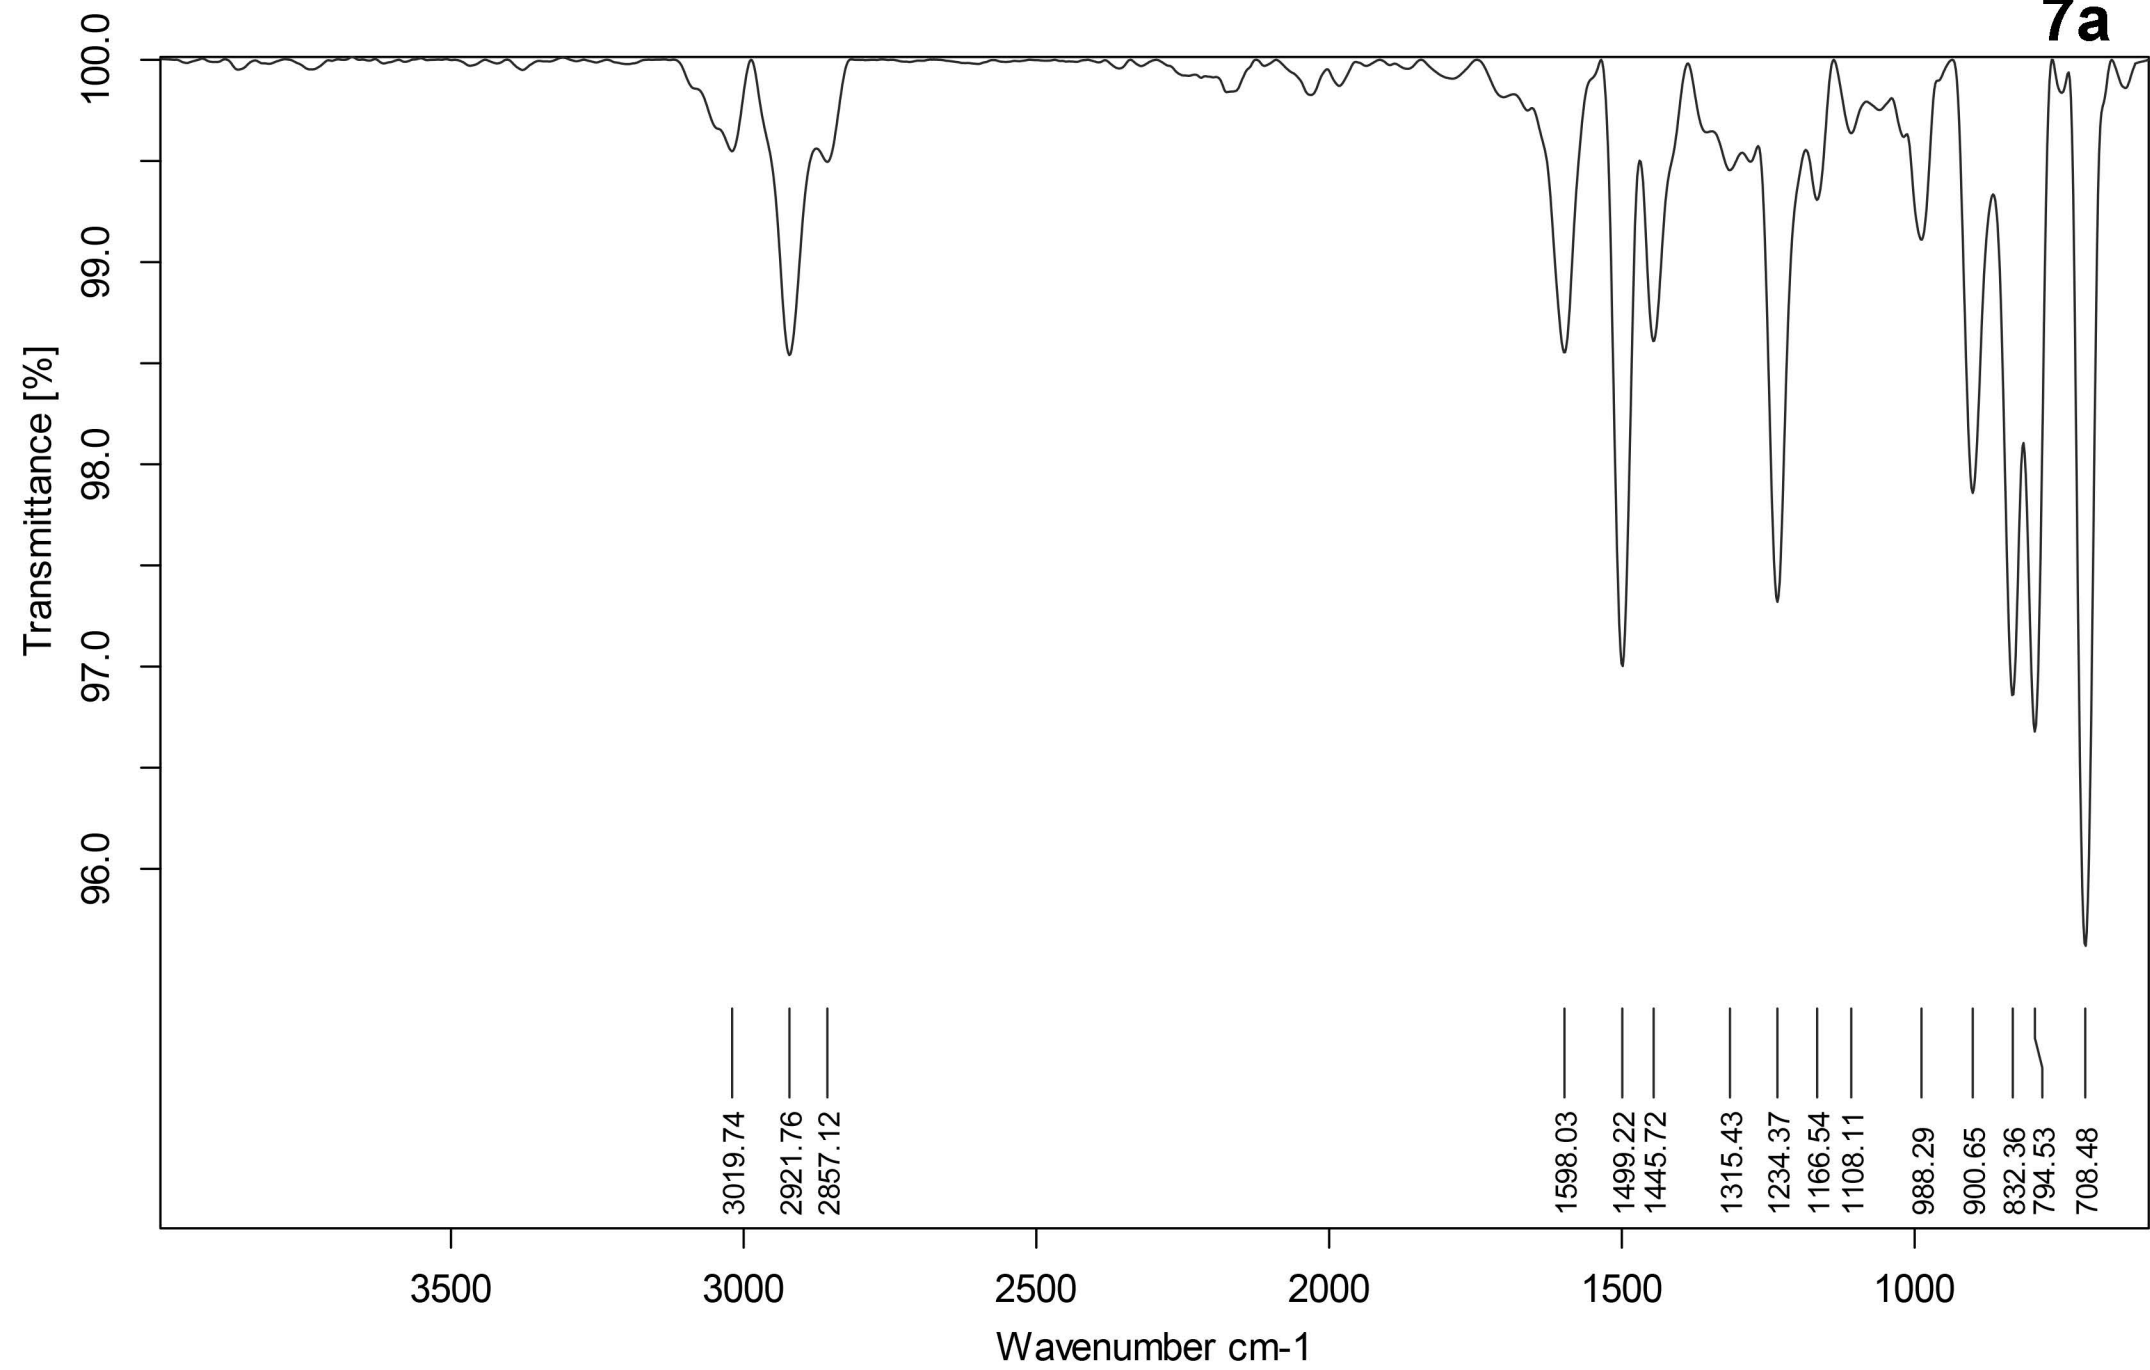

**7b**

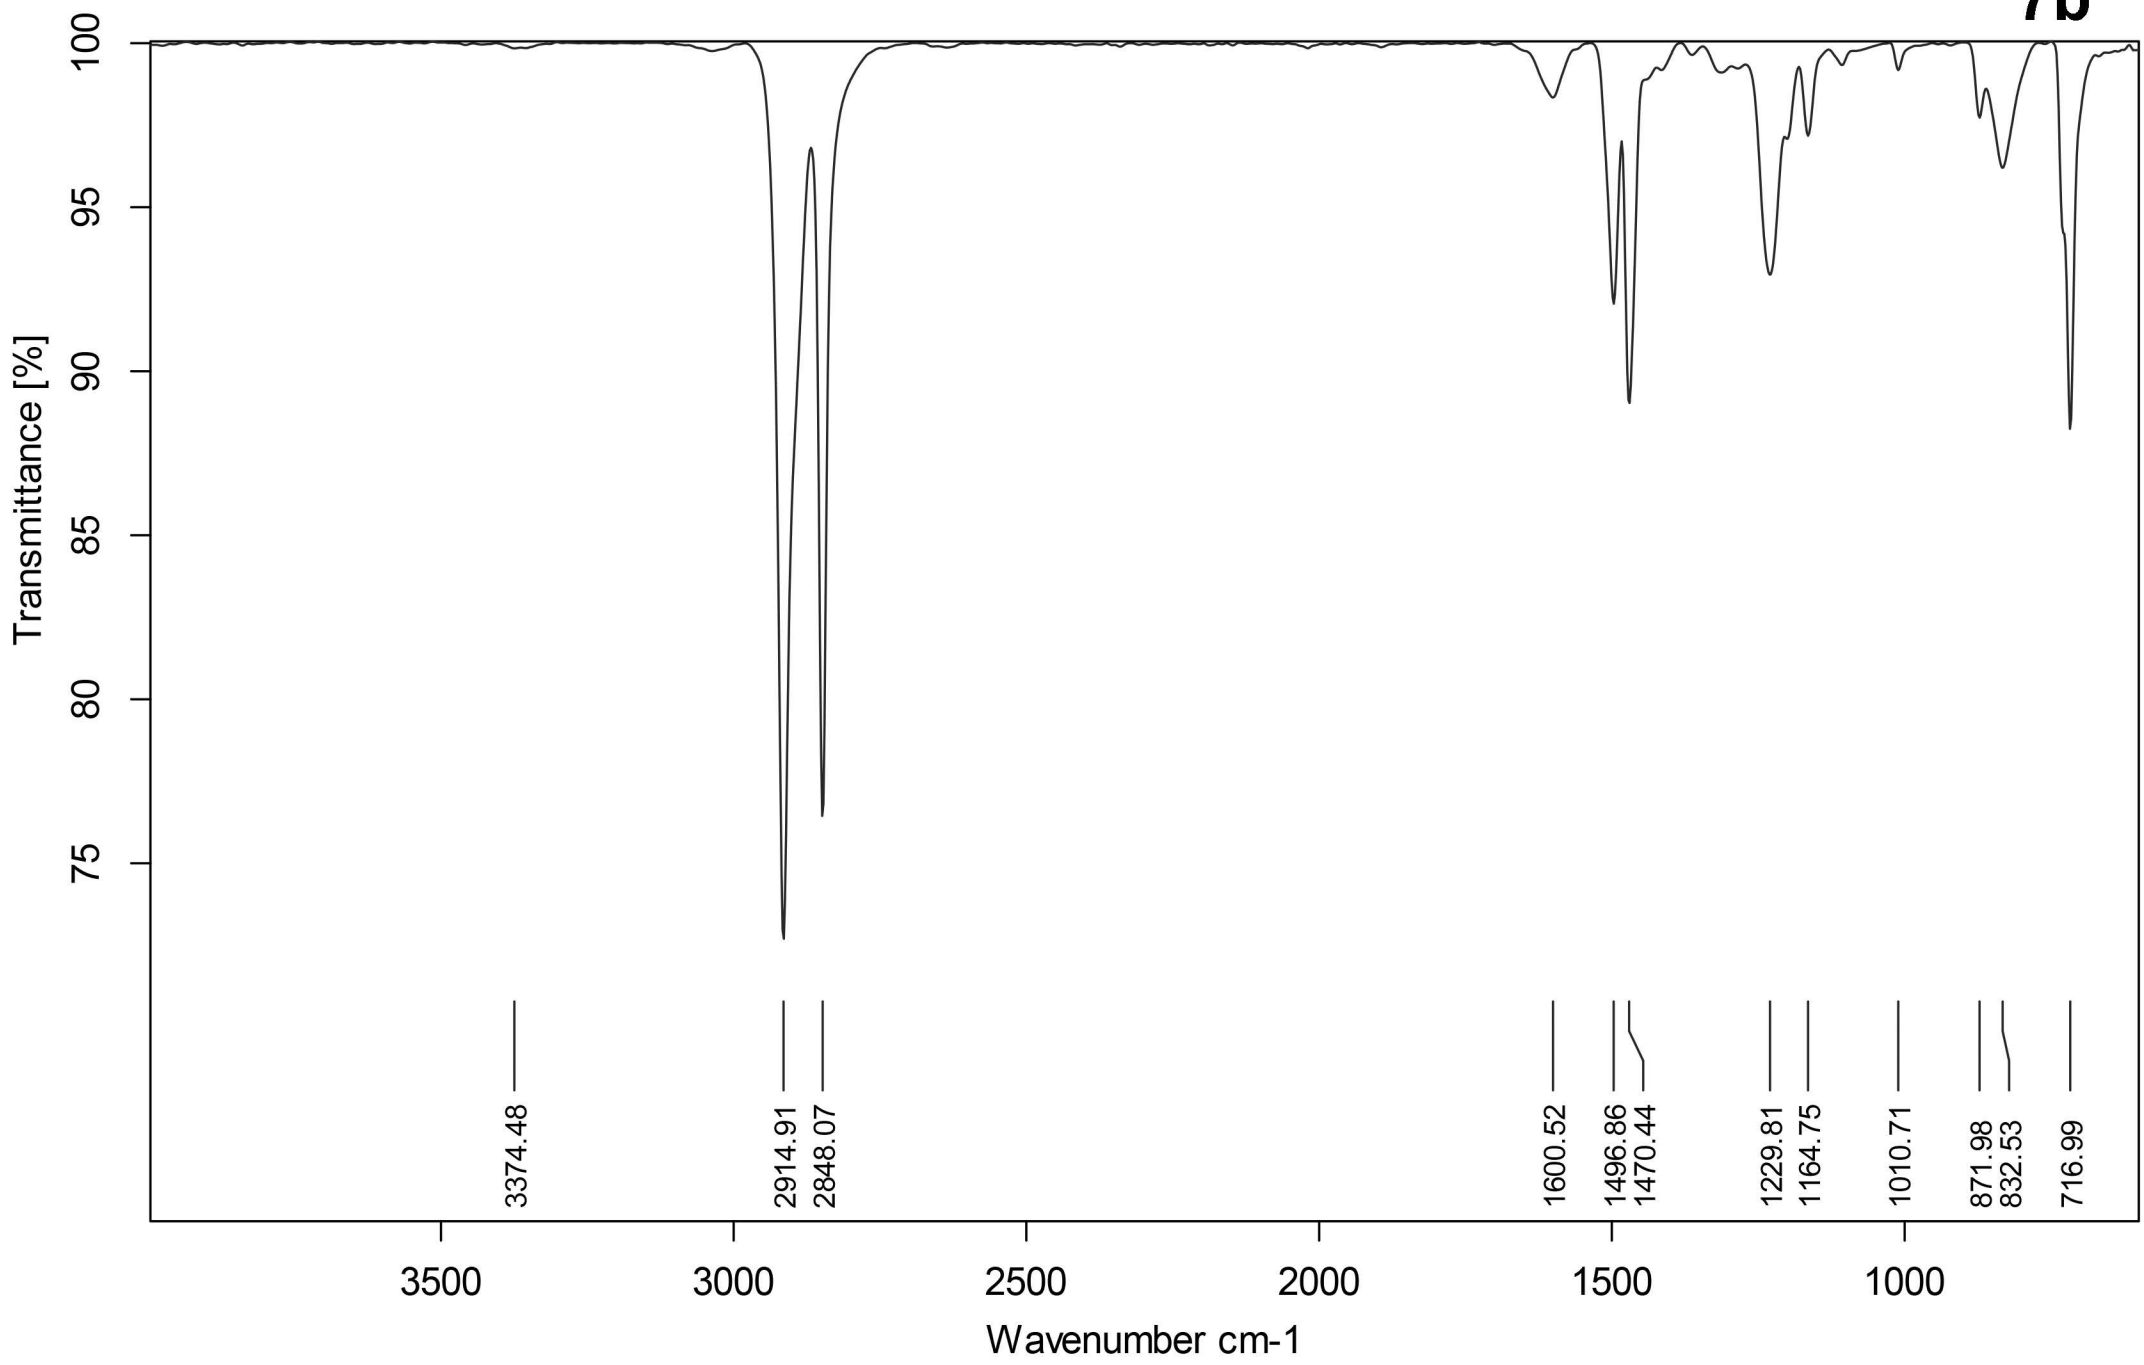

**7c**

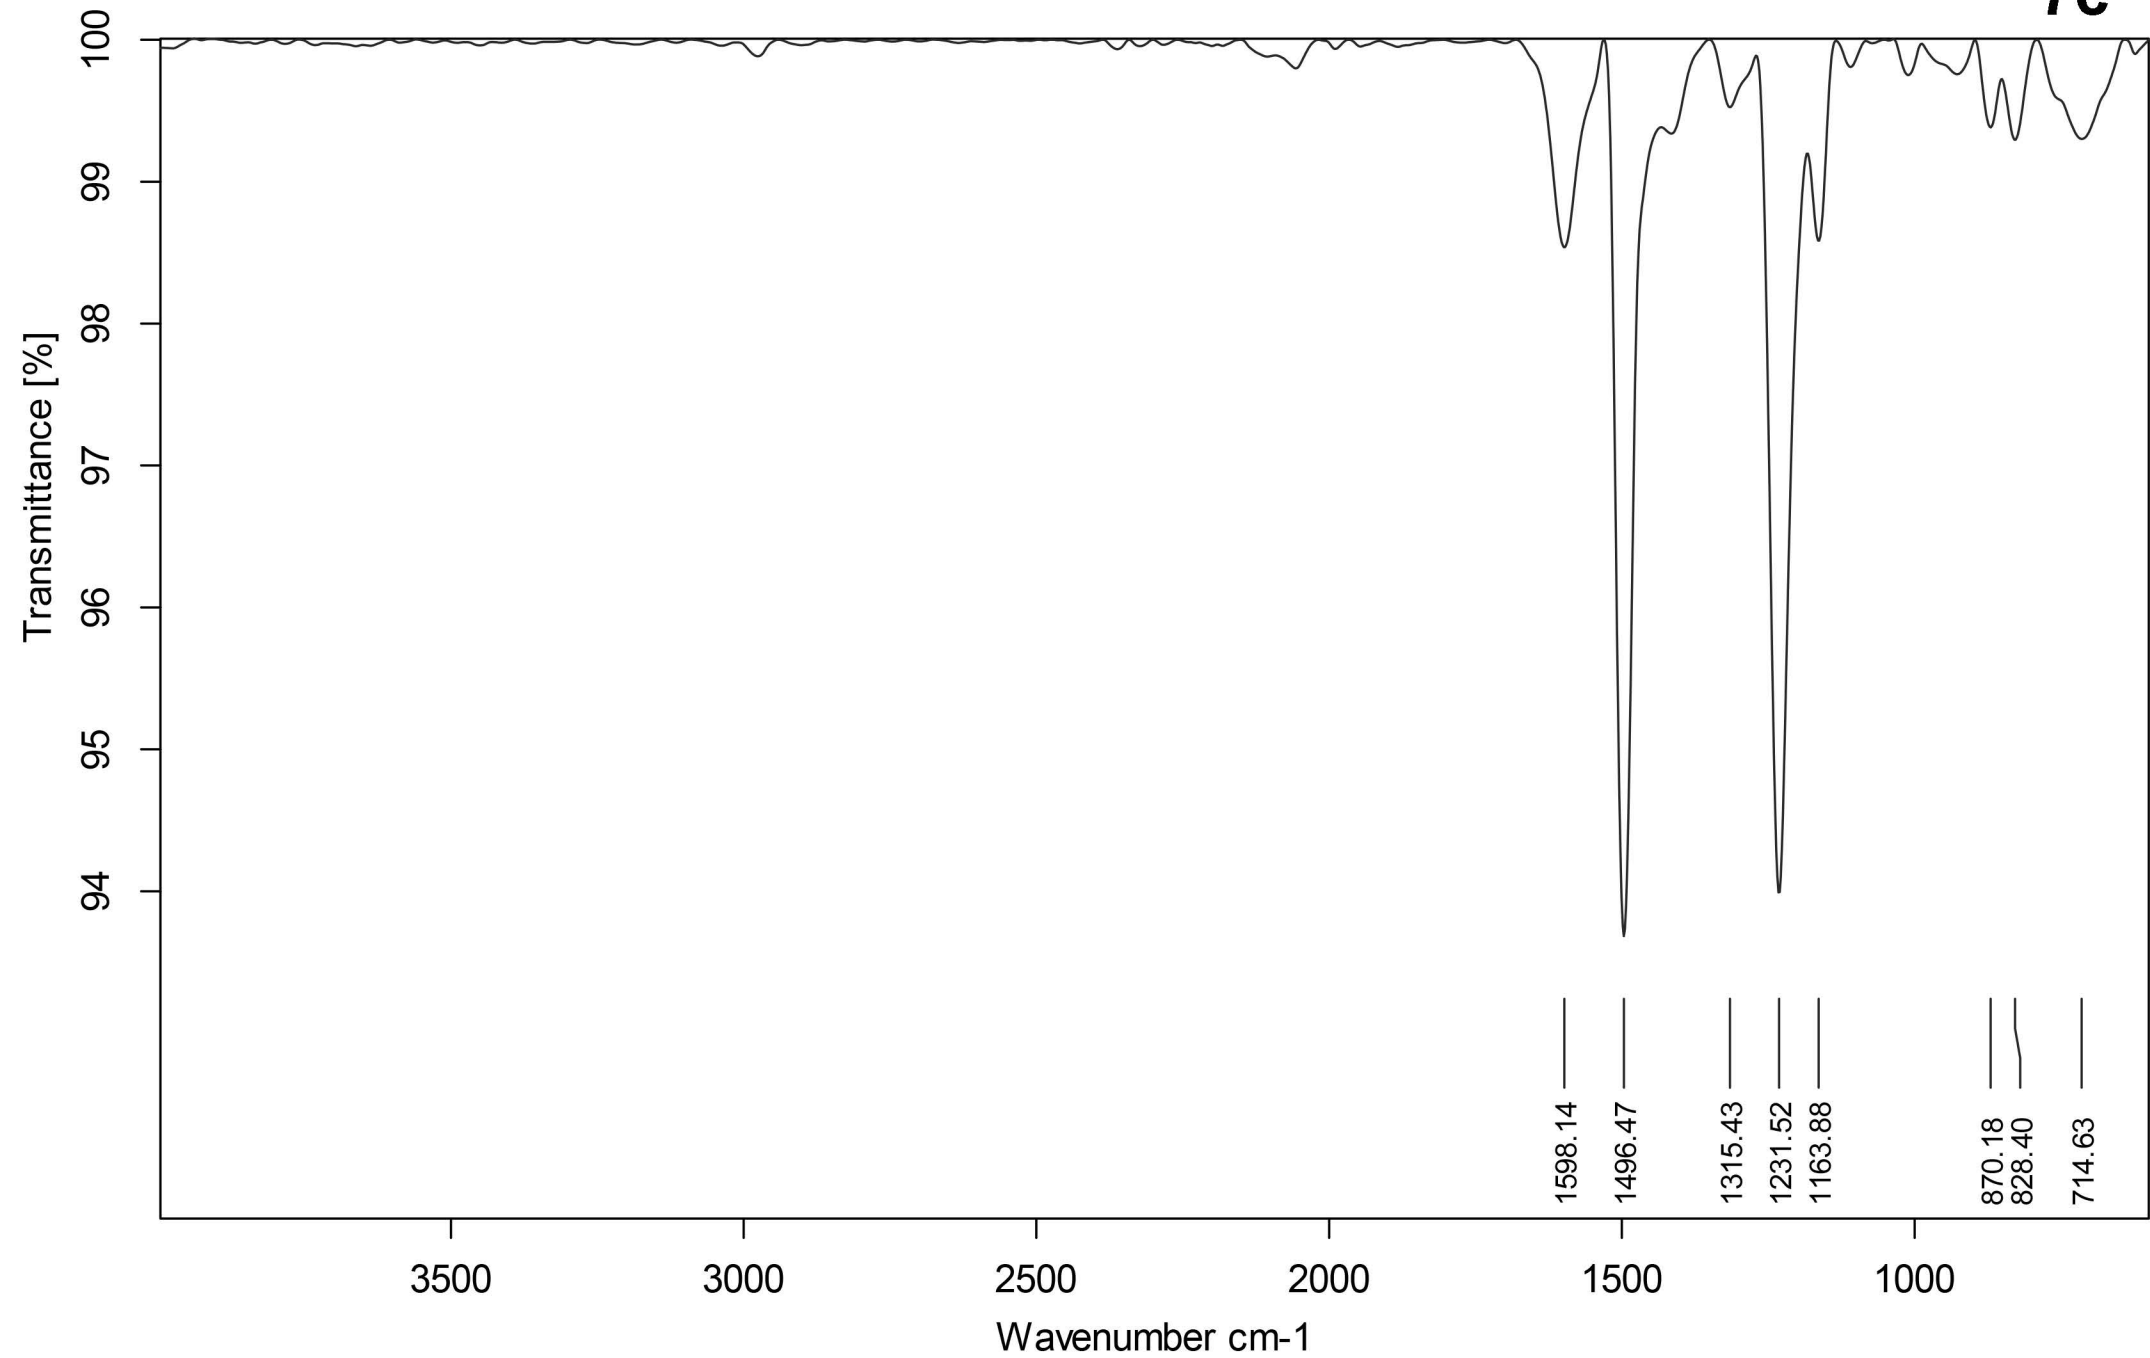

7d

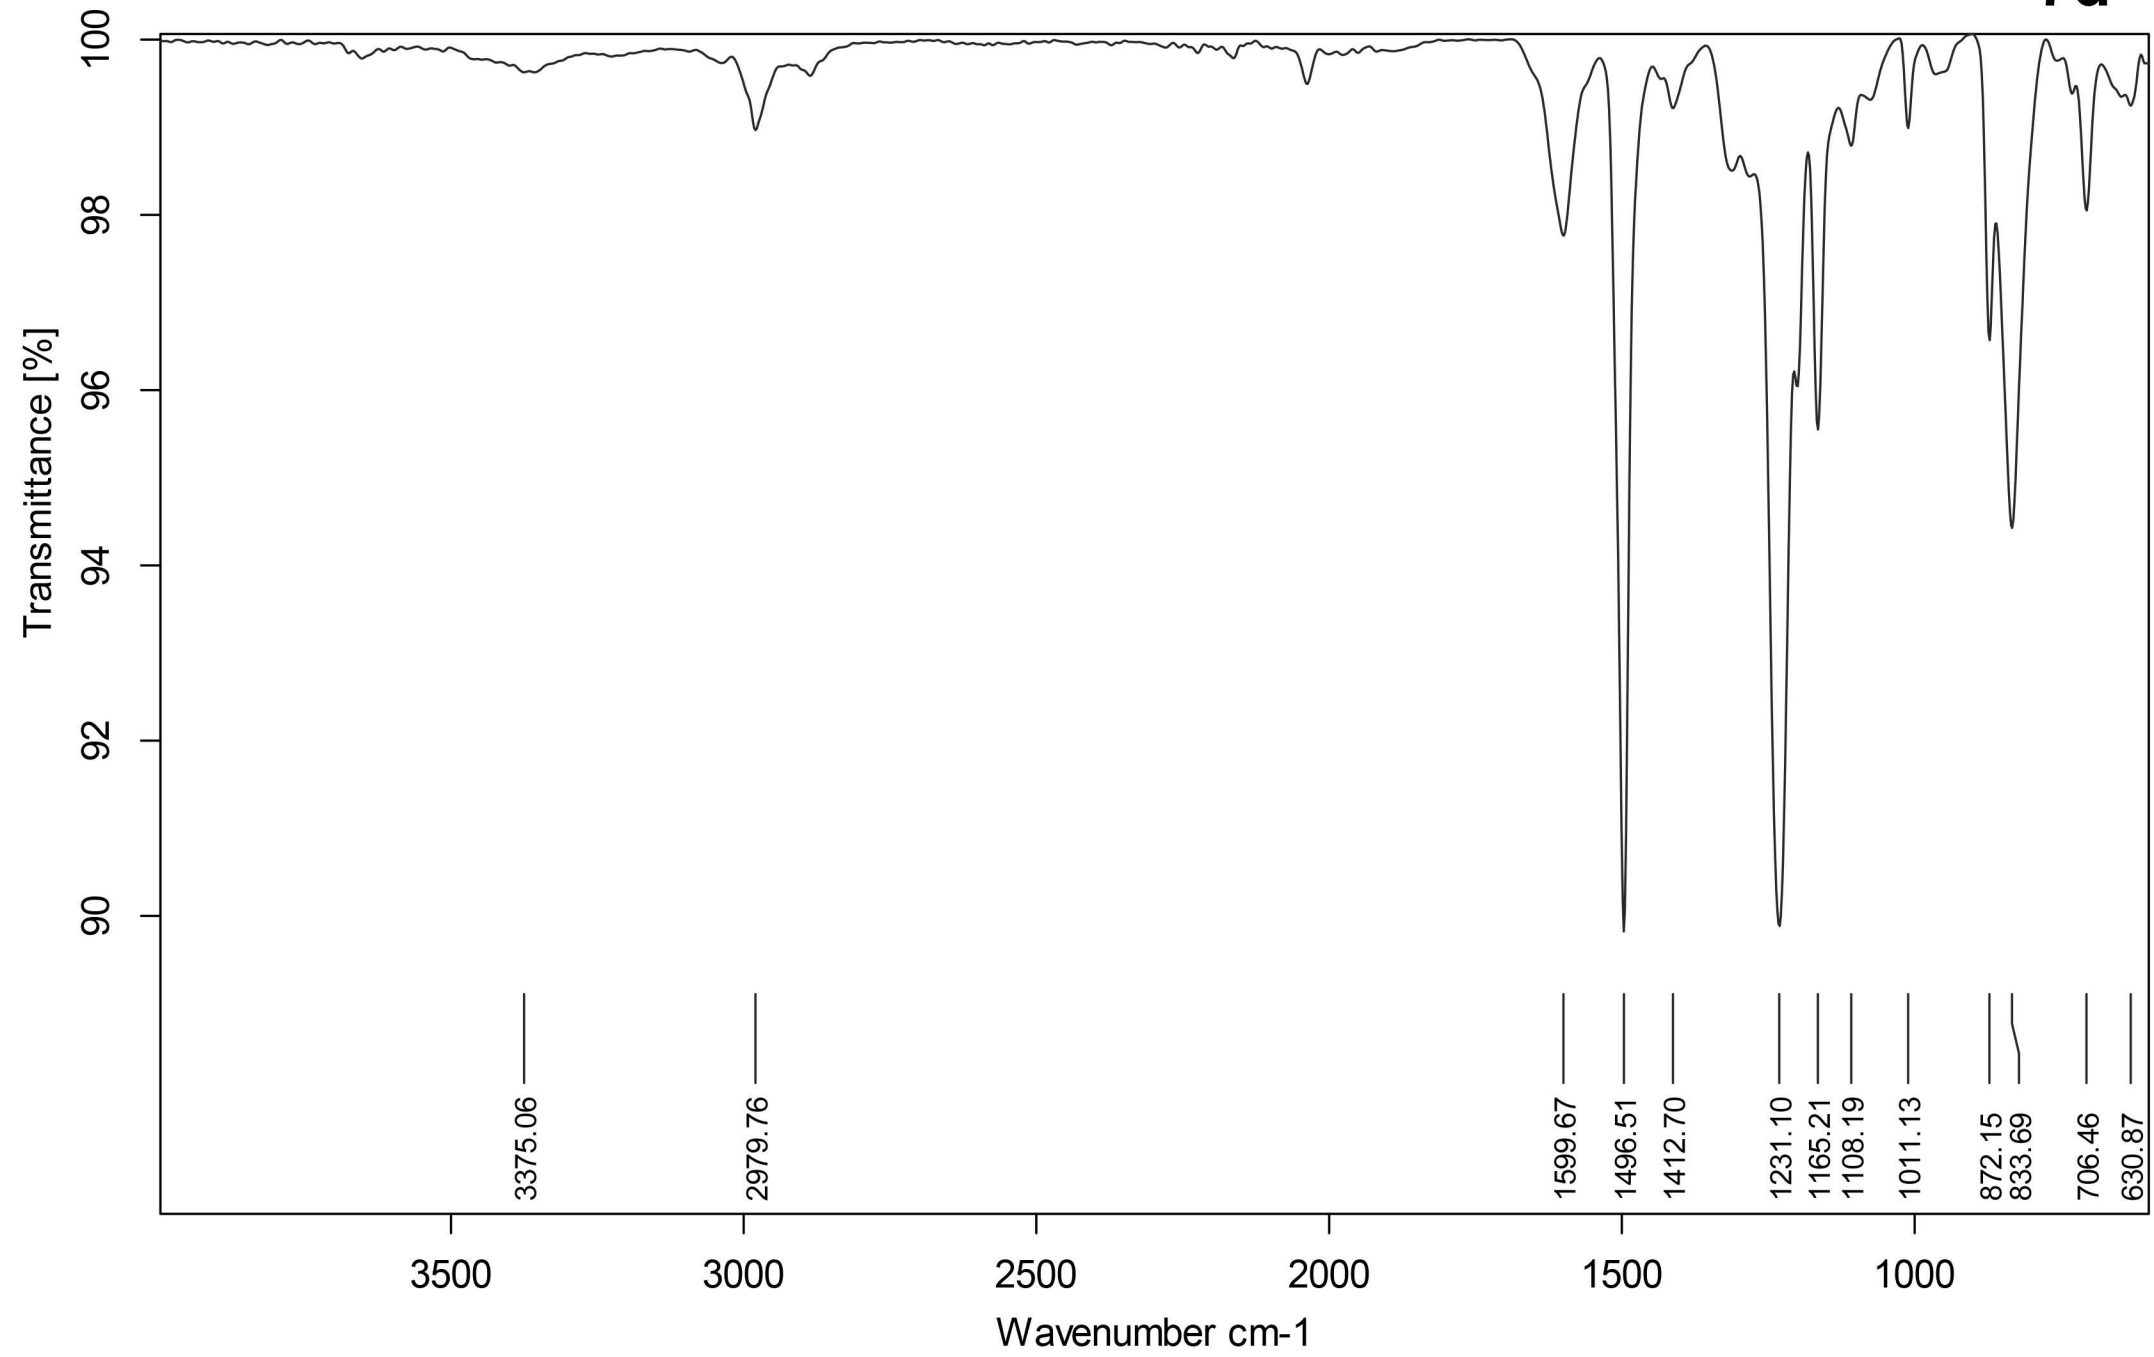

8a

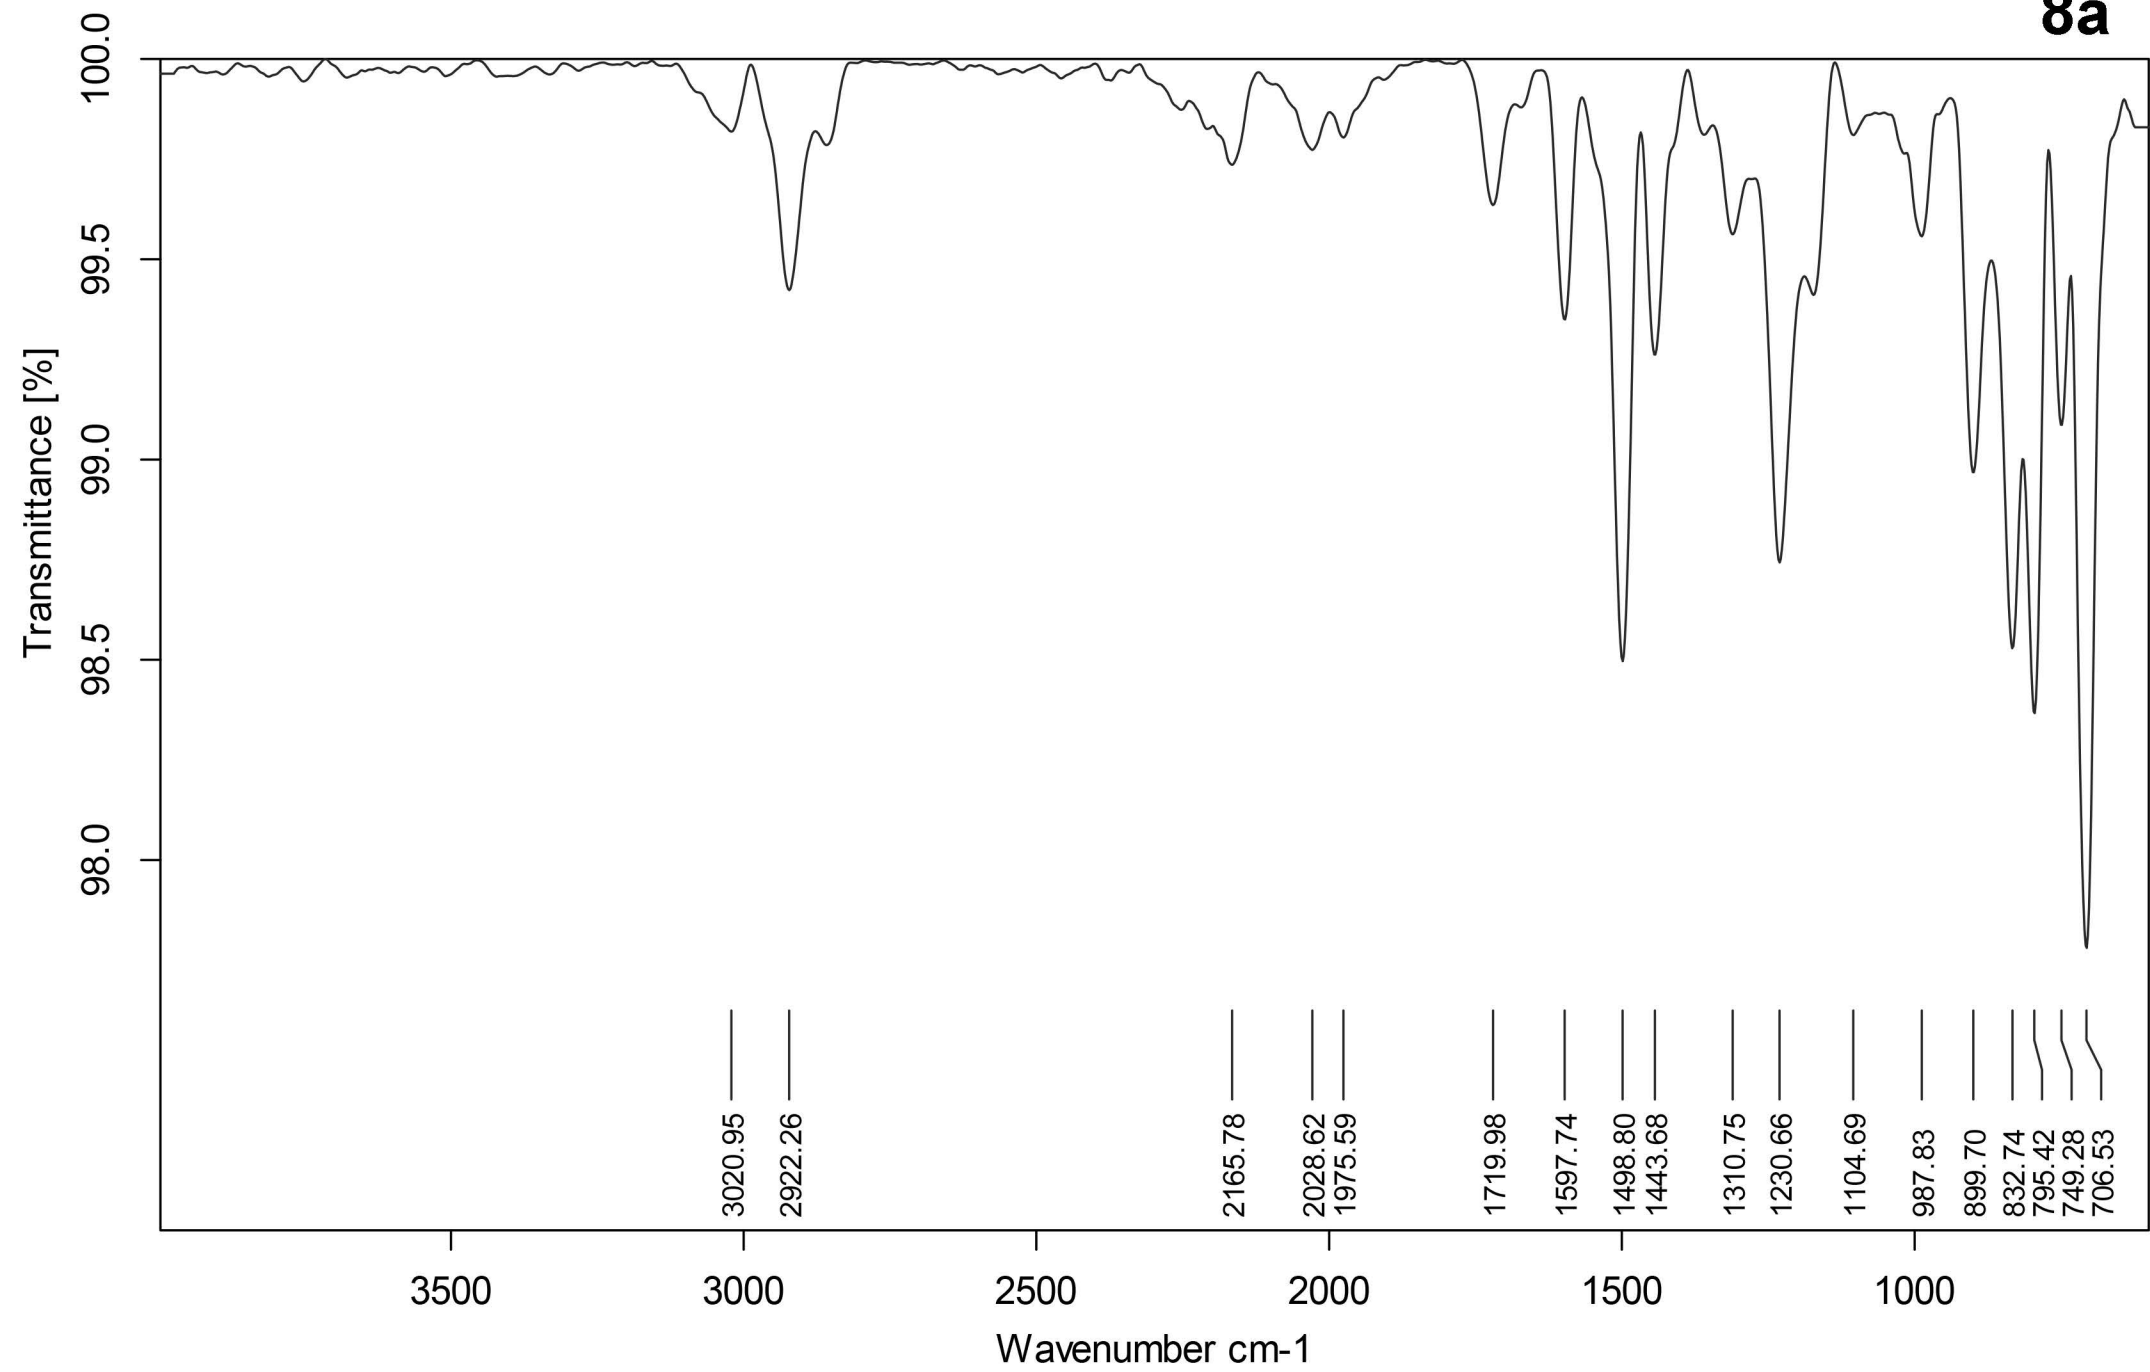



8b

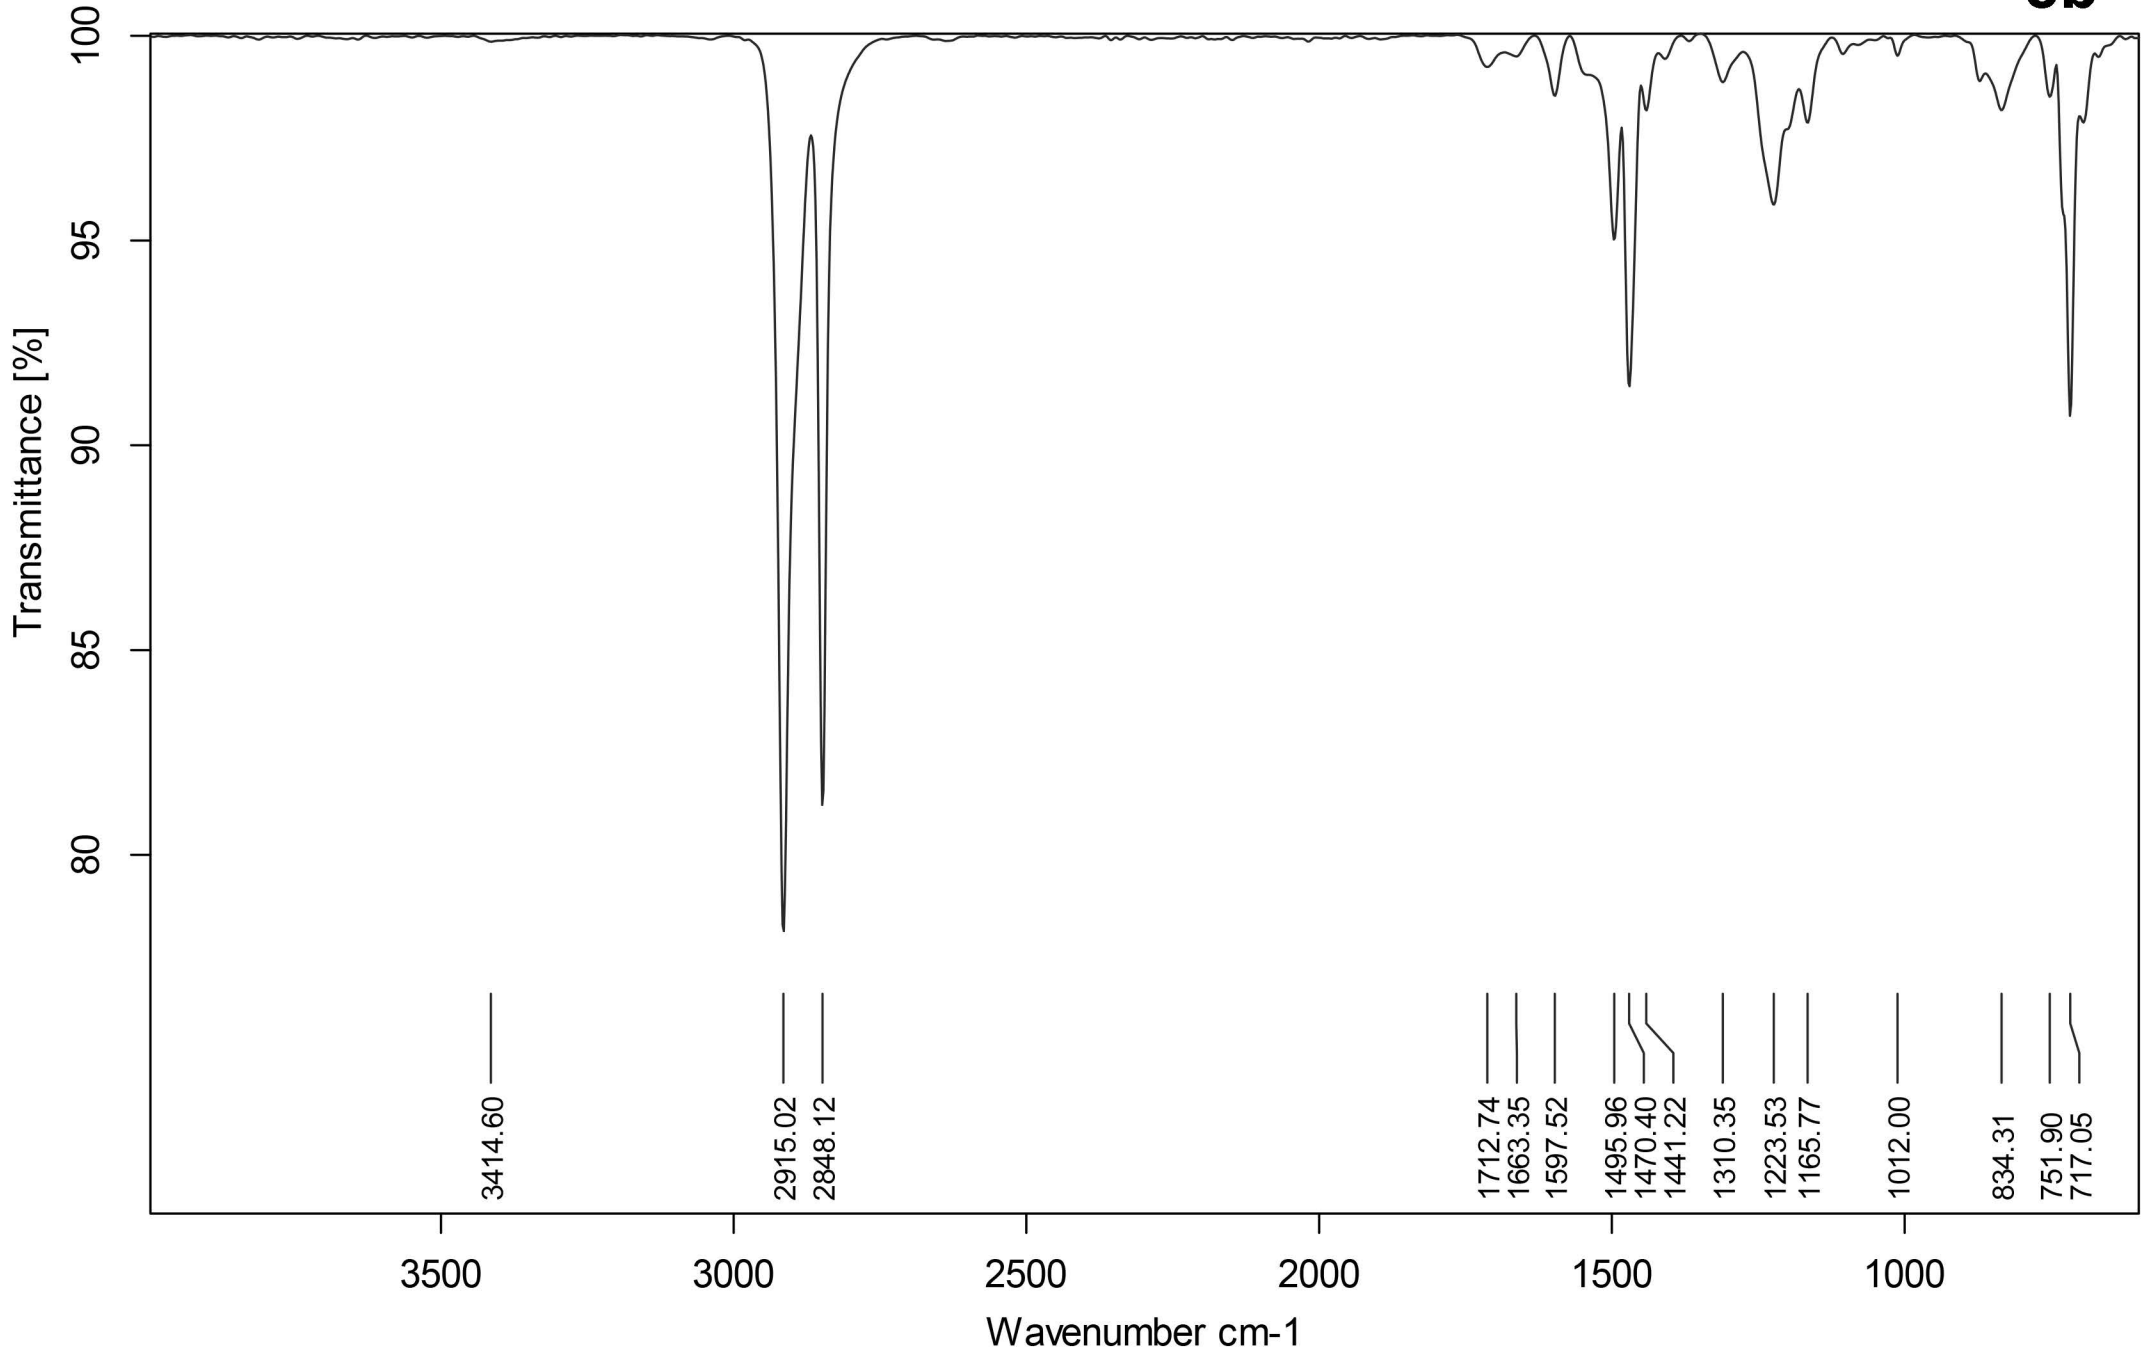

8c

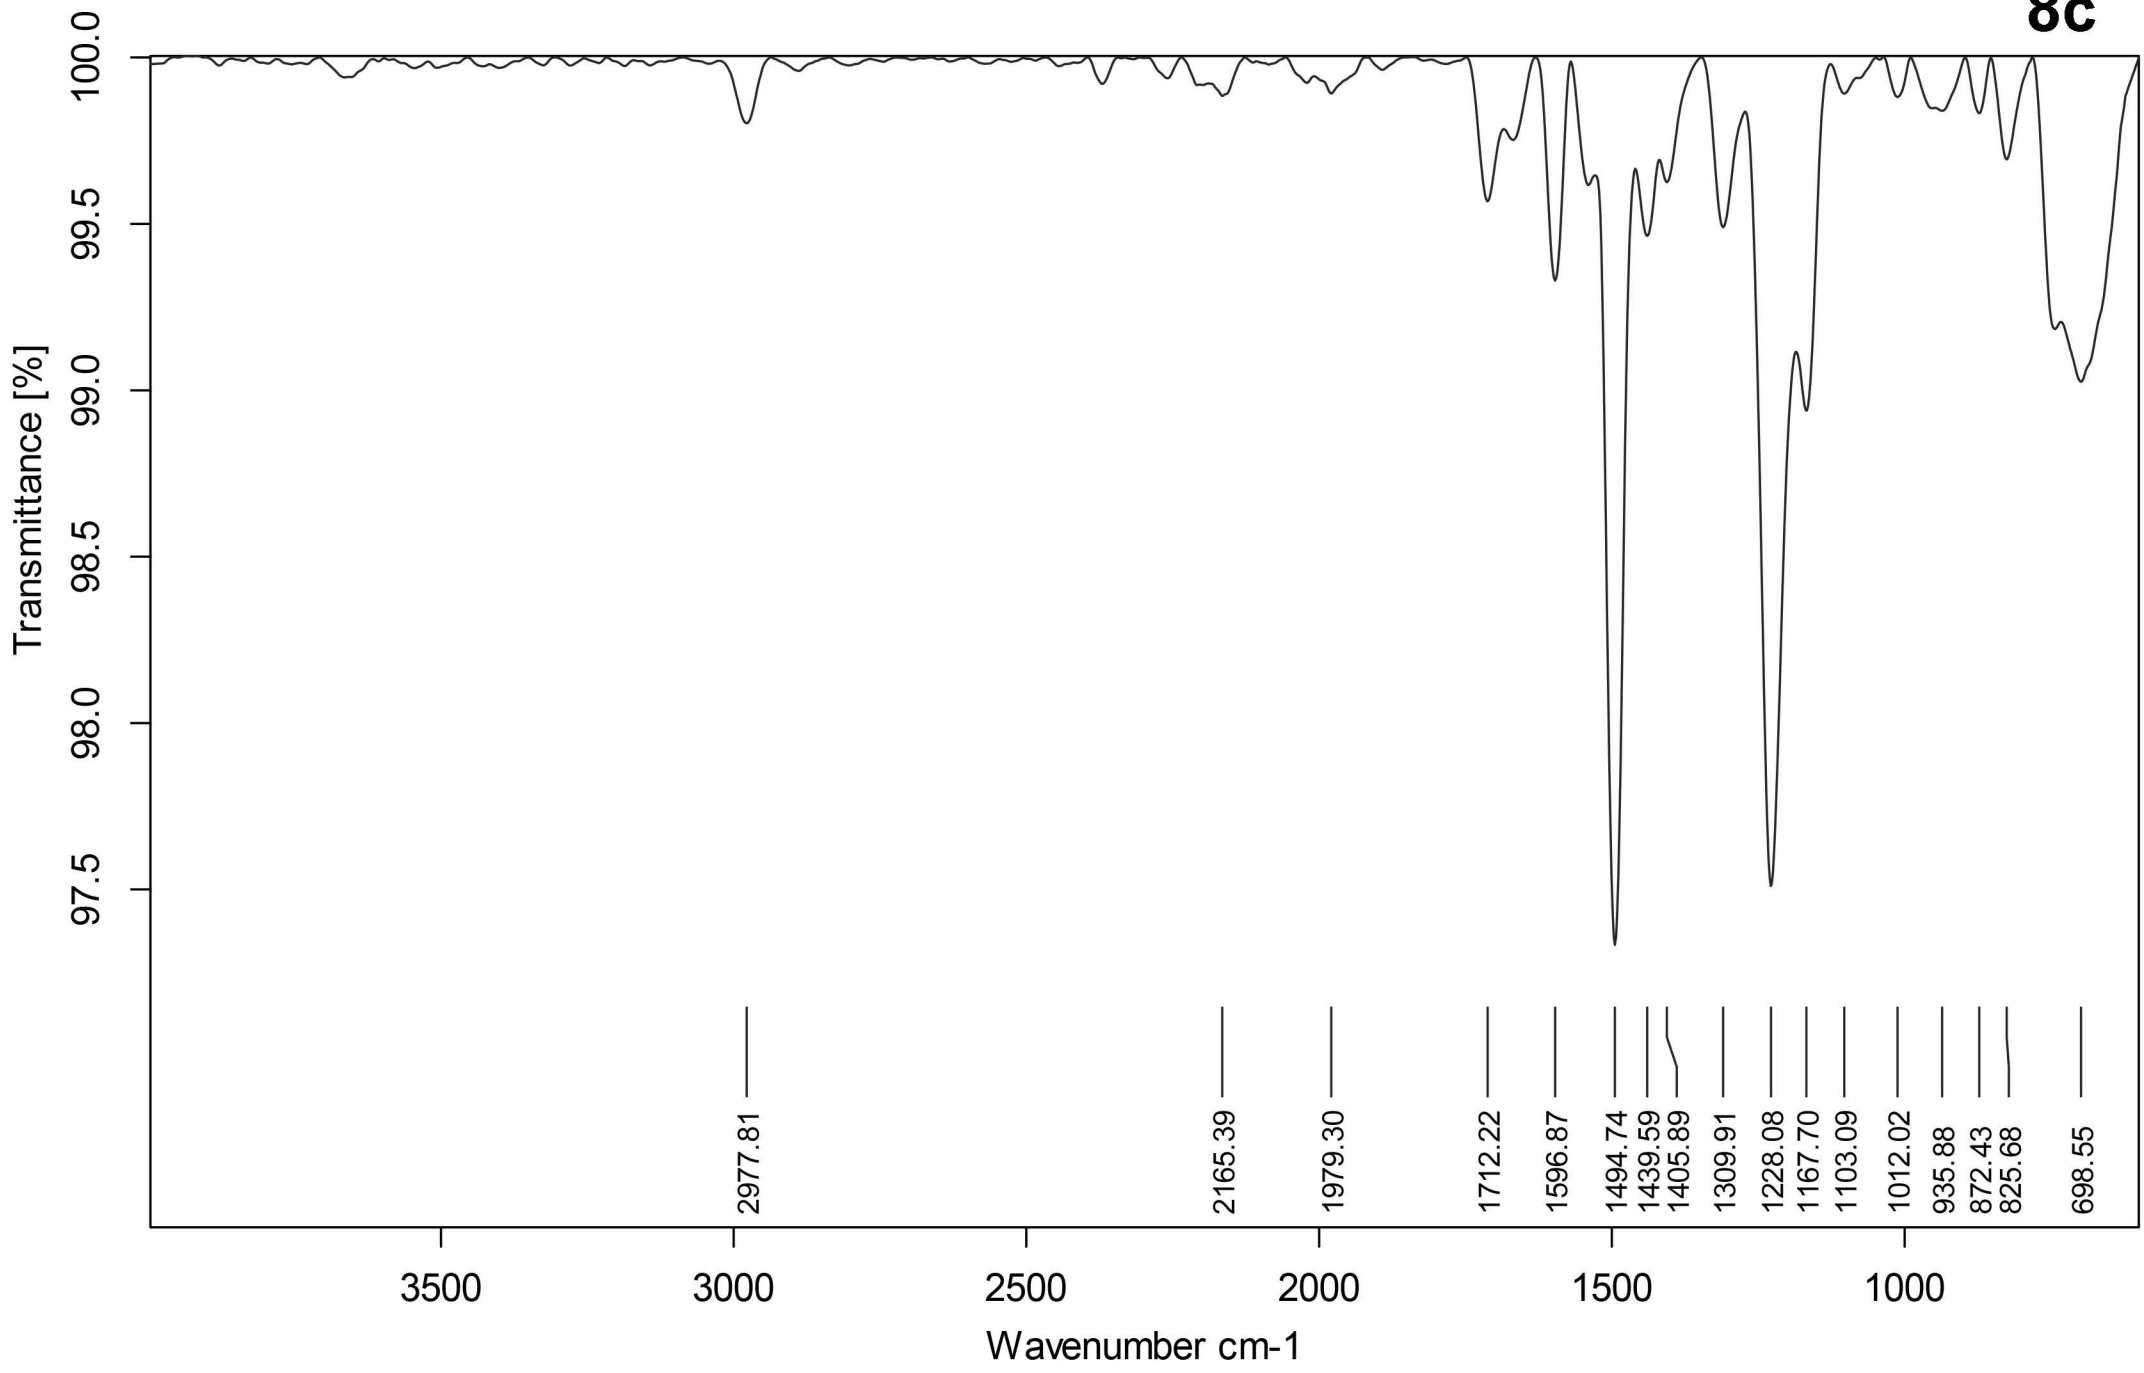

8d

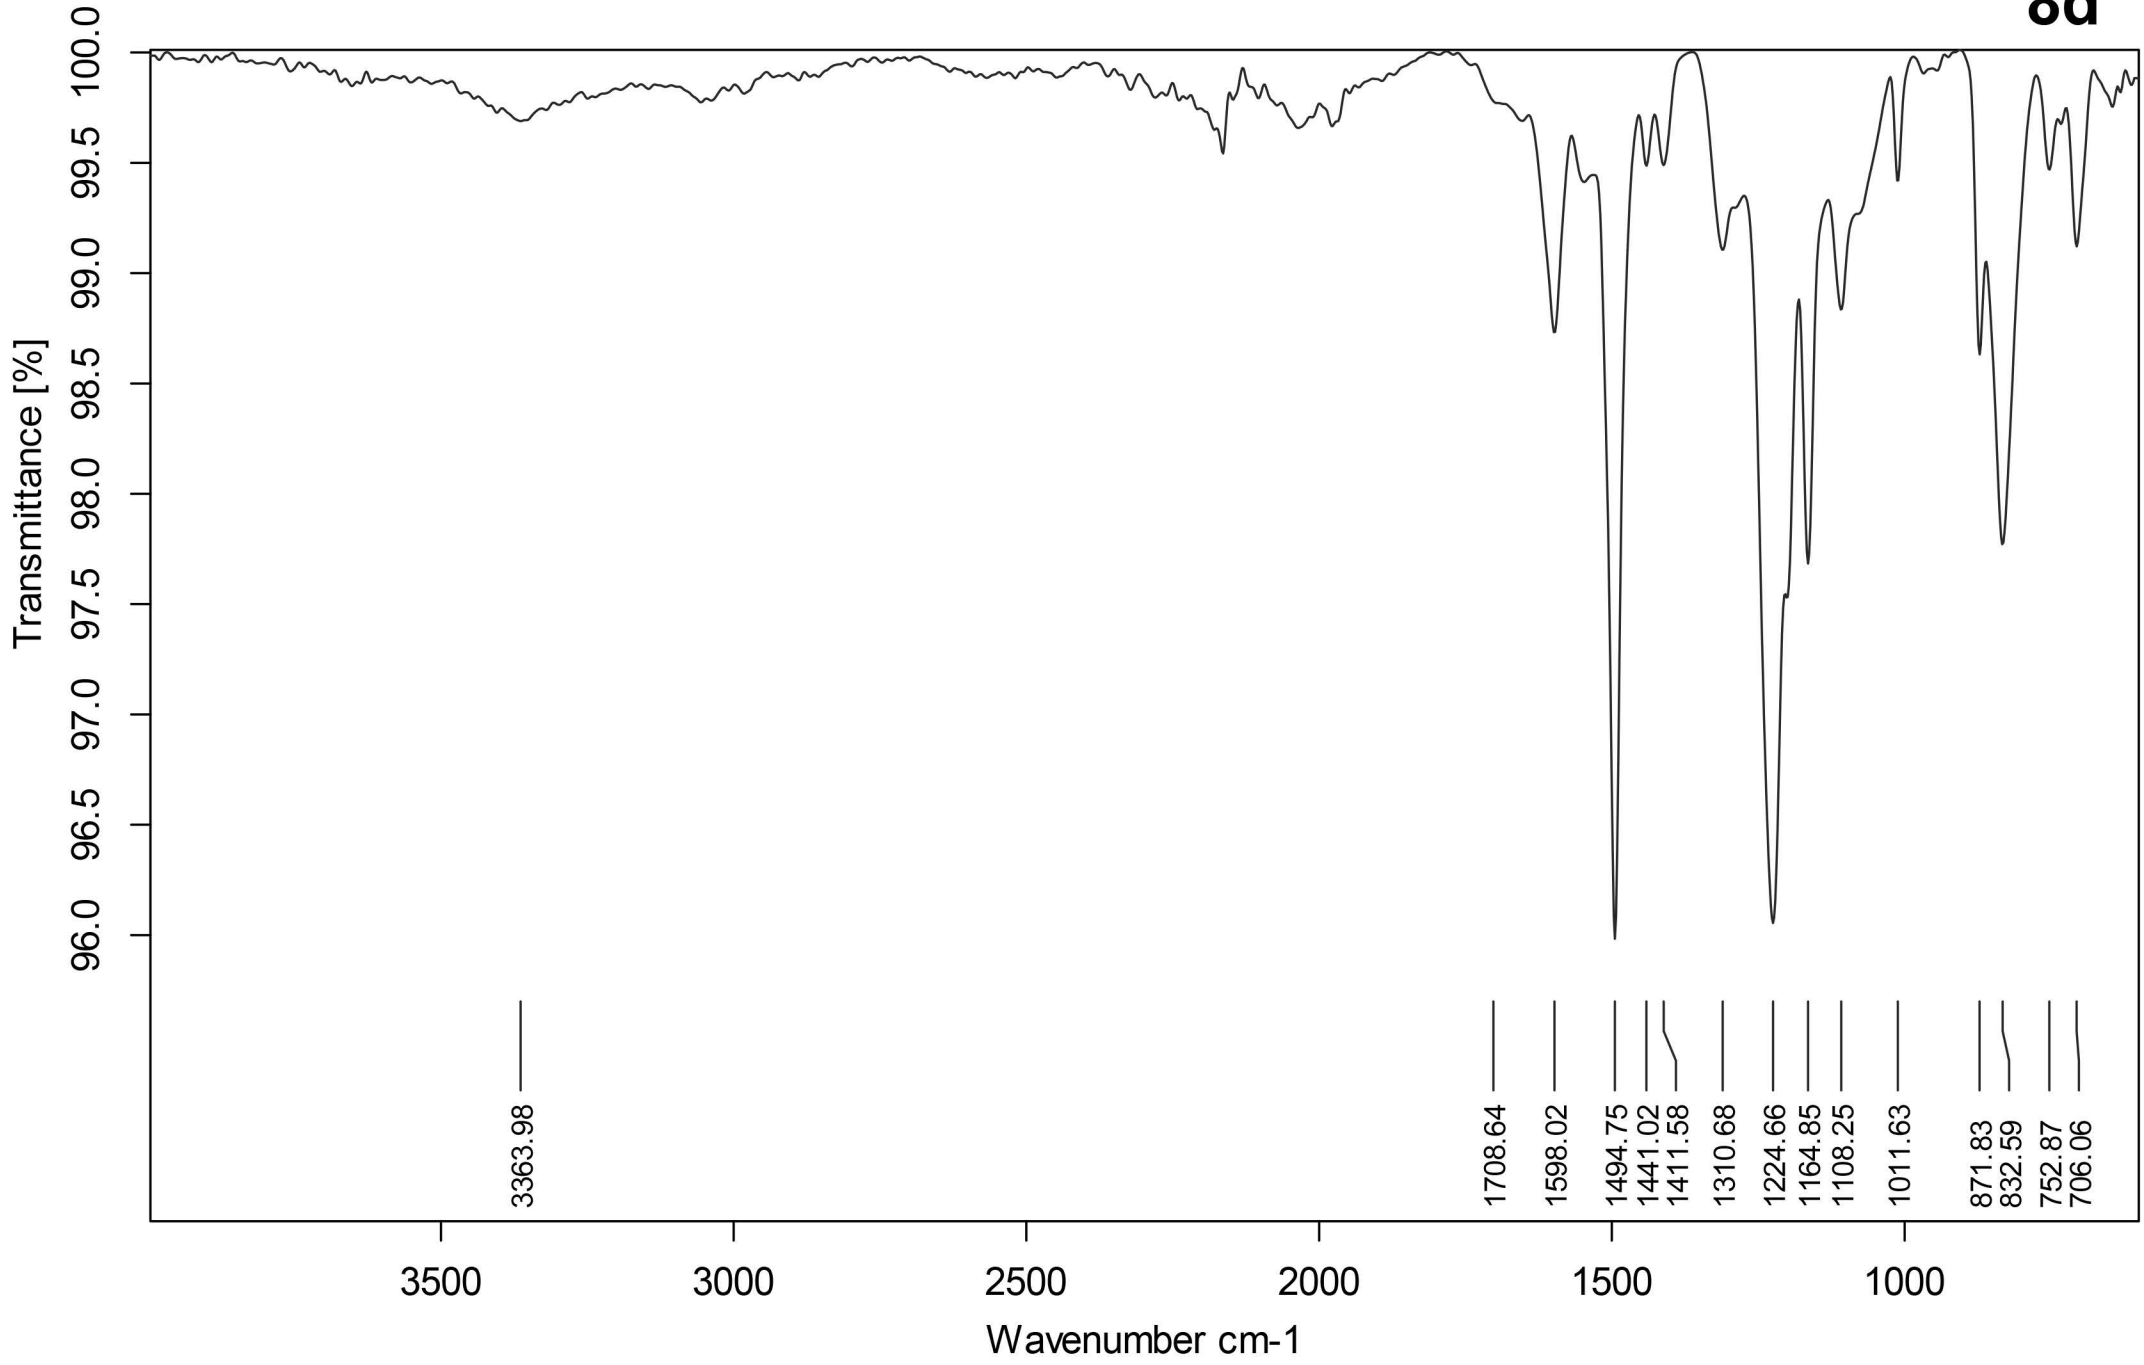

Supplement: c7ra05258h1.pdf [file c7ra05258h1.pdf]
